1  
2  
3  
4  
5  
6  
7  
8  
9  
10  
11  
12  
13  
14  
15  
16  
17  
18  
19  
20  
21  
22  
23

*Title:*                   **Intercellular transmission of a bacterial cytotoxic prion-like protein in mammalian cells**

*Authors:*               Aida Revilla-García<sup>1</sup>, Cristina Fernández<sup>1,†</sup>, María Moreno-del Álamo<sup>1,†</sup>, Vivian de los Ríos<sup>2</sup>, Ina M. Vorberg<sup>3</sup>, Rafael Giraldo<sup>1,†,\*</sup>

*Affiliations:*           <sup>1</sup> Department of Cellular and Molecular Biology, Centro de Investigaciones Biológicas (CSIC), c/ Ramiro de Maeztu 9, 28040 Madrid, Spain.  
<sup>2</sup>Proteomics Facility, Centro de Investigaciones Biológicas (CSIC).  
<sup>3</sup> German Center for Neurodegenerative Diseases (DZNE), Venusberg Campus 1, Building 99, 53127 Bonn, Germany

\* *For correspondence:* [rgiraldo@cnb.csic.es](mailto:rgiraldo@cnb.csic.es)

\* *ORCID Identifier:* 0000-0002-5358-7488

† *Present address:* Dept. of Microbial Biotechnology, CNB-CSIC, C/ Darwin 3, 28049 Madrid

*Keywords:*               bacterial amyloidosis | prion-like | RepA-WH1 | intercellular transmission | neurodegeneration model

## 1     **Abstract**

2     RepA is a bacterial protein that builds intracellular amyloid oligomers acting as inhibitory complexes of  
3     plasmid DNA replication. When carrying a mutation enhancing its amyloidogenesis (A31V), the N-  
4     terminal domain (WH1) generates cytosolic amyloid particles that are inheritable within a bacterial  
5     lineage. Such amyloids trigger in bacteria a lethal cascade reminiscent to mitochondria impairment in  
6     human cells affected by neurodegeneration. To fulfil all the features of a prion-like protein, horizontal  
7     (intercellular) transmissibility remains to be demonstrated for RepA-WH1. Since this is experimentally  
8     intractable in bacteria, here we transiently expressed in a murine neuroblastoma cell line the soluble,  
9     barely cytotoxic RepA-WH1(WT) and assayed its response to co-incubation with *in vitro* assembled  
10    RepA-WH1(A31V) amyloid fibres. In parallel, cells releasing RepA-WH1(A31V) aggregates were co-  
11    cultured with human neuroblastoma cells expressing RepA-WH1(WT). Both the assembled fibres and  
12    the extracellular RepA-WH1(A31V) aggregates induce, in the cytosol of recipient cells, the formation  
13    of cytotoxic amyloid particles. Mass spectrometry analyses of the proteomes of both types of injured  
14    cells point to alterations in mitochondria, protein quality triage, signalling and intracellular traffic.

## 16    **Summary blurb**

17    The horizontal, cell-to-cell spread of a bacterial prion-like protein is shown for the first time in  
18    mammalian cells. Amyloid cross-aggregation of distinct variants, and their associated toxicities, follow  
19    the same trend found in bacteria, underlining the universality of prion biology.

## 21    **Introduction**

22    A hallmark of protein aggregates accumulating in human neurodegeneration is their ability to template  
23    the conformational change of soluble native protein molecules into highly ordered polymers with a  
24    cross- $\beta$  structure termed amyloid (Eisenberg and Sawaya, 2017; Chiti and Dobson, 2017). This has been  
25    extensively characterized for the PrP prion in spongiform proteinopathies (Prusiner, 1998; Aguzzi and  
26    Falsig, 2012), the A $\beta$  peptides (Eisele et al., 2010; Stöhr et al., 2012; Watts et al., 2014) and Tau (Frost  
27    et al., 2009; Clavaguera et al., 2009; Kfoury et al., 2012; Goedert et al., 2017) in Alzheimer's and

1 related dementias, or  $\alpha$ -synuclein in Parkinson's disease (Kordower et al., 2008; Luk et al., 2009; Luk et  
2 al., 2012; Prusiner et al., 2015). Protein aggregates are cell-to-cell transmissible through either  
3 tunnelling nanotubes, secretion as naked aggregates or packed into extracellular vesicles. These  
4 mechanisms underlie the stereotypical spreading of protein aggregates throughout connected brain  
5 regions (Polymenidou and Cleveland, 2012; Soto, 2012; Prusiner, 2013; Goedert, 2015; Jücker and  
6 Walker, 2018). Such 'horizontal' transmissibility, which partially resembles the infectivity of the PrP  
7 prion, qualifies A $\beta$  peptides, Tau and  $\alpha$ -synuclein as prion-like proteins (or prionoids) (Aguzzi and  
8 Lakkaraju, 2016; Scheckel and Aguzzi, 2018).

9 Intercellular aggregate transmission is not solely a characteristic of disease-associated proteins.  
10 Several proteins of lower eukaryotes have the ability to fold into self-templating protein aggregates that  
11 faithfully propagate in progeny and transmit to other cells during mating (Wickner et al., 2015).  
12 Interestingly, the prion-like behaviour is not restricted to the original host. For example, cell-to-cell  
13 propagation of amyloid aggregates has been successfully reported for the NM prion domain of the  
14 *Saccharomyces cerevisiae* translation termination factor Sup35 in mammalian cells (Krammer et al.,  
15 2009; Hofmann et al., 2013; Liu et al., 2016; Duernberger et al., 2018; Riemschoss et al., 2019). NM-  
16 Sup35 can also propagate in bacteria, provided that a specific prion-inducing amyloid required for the  
17 prionization of Sup35 in *S. cerevisiae* is also expressed in the recipient cells (Garrity et al., 2010). The  
18 other way around, both the amyloidogenic sequence stretch in RepA-WH1 (Gasset-Rosa and Giraldo,  
19 2015) and the prion domain in bacterial CbRho (Yuan and Hochschild, 2017) can functionally replace  
20 Sup35 prionogenic sequences in a stop-codon read-through translation assay in yeast. However, the  
21 transmission of a bacterial prion or prion-like protein to mammalian cells and the assessment of its  
22 potential cytotoxicity have not been reported yet. This would complete the demonstration of the  
23 universality of the principles governing prion biology.

24 The bacterial prion-like protein RepA-WH1 is a synthetic model of amyloid disease built on RepA, a  
25 protein that controls plasmid replication through the assembly of amyloid oligomers that hamper  
26 premature rounds of origin firing (Giraldo et al., 2003; Molina-García et al., 2016). The WH1 domain in  
27 RepA forms stable dimers in solution. Upon allosteric binding to distinct ligands, dimers dissociate into  
28 metastable monomers that subsequently assemble as amyloid oligomers and fibres *in vitro* (Giraldo,

1     2007; [Torreira et al., 2015](#)). When expressed in *E. coli*, the hyper-amyloidogenic domain variant RepA-  
2     WH1(A31V) forms particles of various sizes, distributed across the bacterial cytosol ([Fernández-  
3     Tresguerres et al., 2010](#)). These particles are transmissible vertically (during cell division, i.e. from  
4     mother to daughter cells) as two distinct aggregate strains with remarkable appearances and phenotypes:  
5     elongated and mildly cytotoxic, and compact and acutely cytotoxic, respectively ([Gasset-Rosa et al.,  
6     2014](#)). Co-expression of soluble and aggregation-prone RepA-WH1 variants in *E. coli* demonstrated that  
7     the A31V variant can template its conformation on the parental WT protein ([Molina-García and  
8     Giraldo, 2014](#)). Systems analyses ([Molina-García et al., 2017](#)), together with *in vitro* reconstruction in  
9     cytomimetic lipid vesicles ([Fernández et al., 2016b](#); [Fernández and Giraldo, 2018](#)), suggest that RepA-  
10    WH1(A31V) oligomers target the internal bacterial membrane, hampering proton motive force and thus  
11    ATP synthesis and transport through membranes, and enhance oxidative stress. In parallel, protein  
12    factors mounting the defence against stress and envelope damage co-aggregate with RepA-WH1(A31V)  
13    amyloids ([Molina-García et al., 2017](#)). Altogether, bacteria viability is severely compromised by RepA-  
14    WH1 amyloidosis, in a way resembling some of the central mitochondrial routes found in human  
15    amyloidoses ([Haelterman et al., 2014](#); [Norambuena et al., 2018](#); [Mathys et al., 2019](#); [Wang et al., 2019](#)).  
16    However, *E. coli* is not suitable for addressing the issues of cell-to-cell transmissibility of protein  
17    aggregates and the subsequent intracellular amyloid cross-aggregation, since this Gram-negative  
18    bacterium does not uptake large protein particles due to the insurmountable obstacle of its three-layered  
19    cell envelope.

20        To explore the capability of the prion-like protein RepA-WH1 to propagate in a heterologous host,  
21    here we exposed murine neuroblastoma cells, transiently expressing mCherry-tagged soluble RepA-  
22    WH1(WT), to *in vitro* assembled RepA-WH1(A31V) amyloid fibres. In addition, we studied the  
23    intercellular induction of protein aggregation by co-culturing murine cells releasing RepA-WH1(A31V)  
24    aggregates with human neuroblastoma cells stably expressing soluble RepA-WH1(WT). Confocal  
25    microscopy and biochemical studies showed that the mammalian cells can take up RepA-WH1(A31V)  
26    amyloid fibres, that cross-seed the cytosolic aggregation of the endogenous RepA-WH1(WT) in the  
27    recipient cells. Moreover, co-culture of cells releasing the RepA-WH1(A31V) variant also induced the  
28    aggregation of RepA-WH1(WT) in bystander cells, suggesting intercellular transmission of RepA-

1 WH1(A31V) seeds. In both setups of experimental transmission, the induced RepA-WH1(WT)  
2 aggregates were cytotoxic and amyloidogenic in nature, as indicated by cell viability assays and by their  
3 affinity for thioflavin-S, respectively. The observed toxicity was dependent on the expression of RepA-  
4 WH1(WT) in the recipient cells, suggesting that active assembly of protein aggregates and not simple  
5 uptake of toxic polymers was required. This reassures RepA-WH1, whose sequence shows no similarity  
6 matches in the human proteome, as a bio-safe prion-like protein. The analyses of the proteomes of either  
7 murine cells exposed to the *in vitro* assembled fibres, or human cells internalizing the extracellularly  
8 released aggregates, point to the impairment of mitochondria, intracellular trafficking and protein  
9 quality control networks in RepA-WH1 toxicity. The results presented here fulfil the validation of  
10 RepA-WH1 as a bacterial prion-like protein and reinforce the universality of the molecular and cellular  
11 basis of prion biology.

12

## 13 **Results**

### 14 **Transient expression in mammalian cells of variants of the RepA-WH1 protein recapitulates their** 15 **aggregation phenotypes in bacteria**

16 Previous findings on the synthetic amyloid proteinopathy elicited in bacteria by the prion-like protein  
17 RepA-WH1 suggested that it might have features in common with a wide spectrum of human  
18 neurodegenerative amyloidoses. To assess if the model protein RepA-WH1, and its variants exhibiting  
19 distinct aggregation propensities in bacteria ([Fernández-Tresguerres et al., 2010](#); [Gasset-Rosa et al.,](#)  
20 [2014](#); [Molina-Garcia et al., 2014](#)), exhibit a comparable behaviour in mammalian cells, proteins were  
21 transiently expressed in murine N2a and human SH-SY5Y neuroblastoma cell lines, commonly used in  
22 studies about amyloid neurodegeneration, as well as in non-neuronal HeLa cells.

23 RepA-WH1 mutant variants were fused to the monomeric fluorescent protein mCherry in a  
24 constitutive expression plasmid ([Figure S1A](#)). These fusions, hereafter referred as  
25 WH1(WT/A31V/ $\Delta$ N37)-mCherry for simplification, were the same that had been previously validated  
26 regarding their aggregation potential and toxicity in *E. coli* ([Fernández-Tresguerres et al., 2010](#); [Gasset-](#)  
27 [Rosa et al., 2014](#); [Molina-Garcia et al., 2014](#); [Molina-Garcia et al., 2017](#)). While WH1(WT)-mCherry is  
28 soluble in the bacterial cytosol and non-cytotoxic, the hyper-amyloidogenic (A31V)-mCherry variant

1 aggregates and is highly cytotoxic. WH1( $\Delta$ N37) is a deletion mutant lacking the amyloidogenic peptide  
2 stretch in RepA-WH1 that forms inclusion bodies. When this mutant is expressed in bacteria, it exhibits  
3 reduced toxicity compared to WH1(A31V)-mCherry. Cell lines were transfected with the plasmids  
4 coding for RepA-WH1 derivatives, or mCherry as a control. Soluble fractions of cell lysates were  
5 analyzed by Western blotting, 48 h after transient transfection, revealing variable protein expression in  
6 the three cell lines tested. The highest expression levels were observed in the N2a cells (Figure S1B).  
7 Variant WH1( $\Delta$ N37)-mCherry was not observed in any cell lysate. The N2a cell line was selected as an  
8 appropriate cell background for further exploring RepA-WH1 prion-like behaviour in mammalian cells.  
9 As previous work in bacteria had shown that WH1( $\Delta$ N37)-mCherry forms massive inclusion bodies  
10 (Gasset-Rosa et al., 2014; Molina-Garcia et al., 2014), we explored the presence of this variant in the  
11 insoluble lysate fraction of the N2a cells. WH1( $\Delta$ N37)-mCherry was clearly located in the pellet,  
12 according to Western blot analysis (Figure S1B, right panel), thereby confirming that this mutant also  
13 forms insoluble aggregates in the mammalian cytosol.

14 To evaluate the possible cytotoxicity of RepA-WH1, the N2a transfected cells were observed by  
15 means of confocal microscopy. As observed in Figure 1A, WH1(WT)-mCherry and the mCherry  
16 control remained phenotypically soluble (i.e., they showed diffuse cytoplasmic fluorescence) when  
17 overexpressed, which demonstrated that none of them has tendency towards spontaneous aggregation.  
18 On the contrary, for the WH1(A31V)-mCherry mutant, small red foci were clearly detected in the  
19 cytosol, which correlated with its natural propensity to aggregate in bacteria (Fernández-Tresguerres et  
20 al., 2010; Gasset-Rosa et al., 2014; Molina-Garcia et al., 2014). Finally, larger intracellular foci, distinct  
21 to those for WH1(A31V)-mCherry, were observed when WH1( $\Delta$ N37)-mCherry was expressed.

22 Remarkably, the inspection of nuclei morphology by confocal microscopy revealed the noticeable  
23 presence of N2a cells exhibiting a fragmented or condensed nucleus upon WH1(A31V)-mCherry  
24 expression, a sign for cell death. This phenotype was rare in cells expressing WH1(WT/ $\Delta$ N37)-  
25 mCherry, or the mCherry control (Figure 1A). Quantitative analysis of the cells showing nuclear  
26 condensation/fragmentation at 24, 48 and 72 h after transfection revealed that such difference was  
27 statistically significant (Figure 1B). A substantial decrease in the number of WH1(A31V)-mCherry  
28 expressing cells was detected at 48 h and, specially, 72 h after transfection, while similar numbers of

1 either mCherry control or WH1(WT/ $\Delta$ N37)-mCherry transfected N2a cells were counted over time.  
2 Such reverse correlation between fragmented/condensed nuclei and cell count supports the cytotoxicity  
3 of WH1(A31V).

4 To further assess the cytotoxic effect of WH1(A31V)-mCherry overexpression in N2a cells, cell  
5 viability was estimated by monitoring the activity of NAD(P)H-dependent oxidoreductases 24, 48 and  
6 72 h after transfection (Figure 1C). The MTT reduction assay revealed a decrease in cell viability,  
7 compared to the mCherry control, for cells expressing either WH1(A31V)-mCherry or WH1( $\Delta$ N37)-  
8 mCherry. This toxicity was time-dependent and most pronounced for cells expressing WH1(A31V)-  
9 mCherry, resulting in a decrease of cell viability by about 60% at 48 h, to reach 90% at 72 h. On the  
10 contrary, no time-dependent changes in cell viability were detected for mCherry and WH1(WT)-  
11 mCherry.

12 To verify that the cytotoxic aggregates formed by RepA-WH1 in the N2a cells were of amyloid  
13 nature, we relied on thioflavin-S (ThS), an amyloidotropic fluorophore that stains RepA-WH1 amyloids  
14 in bacteria (Fernández-Tresguerres et al., 2010; Gasset-Rosa et al., 2014; Giraldo, 2019). Forty-eight  
15 hours after WH1(WT/A31V/ $\Delta$ N37)-mCherry or mCherry transfection, staining with ThS was  
16 performed and cells were visualized by confocal microscopy (Figure 2). Image analysis revealed that in  
17 the N2a cells expressing WH1(A31V)-mCherry, the aggregated foci were strongly stained by ThS, an  
18 indication of their amyloid nature. In contrast, weak, near background ThS staining was observed for  
19 cells expressing either the mCherry control, the soluble WH1(WT)-mCherry protein, or for the large  
20 WH1( $\Delta$ N37)-mCherry aggregates. Reduced binding of the fluorophore was previously considered  
21 indicative of the amorphous aggregation of WH1( $\Delta$ N37)-mCherry as bacterial inclusion bodies (Gasset-  
22 Rosa et al., 2014).

23  
24 ***In vitro*-assembled RepA-WH1(A31V) amyloid fibres co-localize with RepA-WH1(WT)**  
25 **transiently expressed in the cytosol of murine cells**

26 One of the most remarkable properties of amyloid aggregates is their inherent self-propagation potential,  
27 being able to template the amyloid conformation on soluble molecules of the same protein. For RepA-  
28 WH1 this had been shown in *E. coli in vivo* by co-expressing WH1(A31V) and WH1(WT) labelled with



1 different fluorescent proteins (Molina-García and Giraldo, 2014). Thereby, validation of RepA-WH1 as  
2 a ‘generic’ model for amyloidosis required testing its ability to cross-seed aggregation within  
3 mammalian cells.

4 We explored whether exogenous, *in vitro* assembled WH1(A31V) fibres (Figure S2), whose amyloid  
5 nature has been well established (Giraldo, 2007; Fernández-Tresguerres et al., 2010; Moreno del Álamo  
6 et al., 2015; Torreira et al., 2015; Fernández et al., 2016a), could trigger the aggregation of the otherwise  
7 soluble WH1(WT) protein (Figure 1A, second row) in the cytosol of mammalian cells. To this aim, N2a  
8 cells transiently expressing WH1(WT)-mCherry in the cytosol were exposed to *in vitro* pre-assembled  
9 WHI(A31V)-Alexa 488 labelled amyloid fibres (for simplification, hereafter WH1(A31V) fibres)  
10 (Figure 3A). These were mechanically fragmented before incubation with cells to get fibre sizes more  
11 suitable for their uptake (see Materials and Methods) (Figure S2). To check for the specific requirement  
12 of the WH1(WT) domain as the target for aggregation templating by WH1(A31V) fibres, control cells  
13 expressing just mCherry were incubated with the fibres in parallel. Confocal microscopy sections  
14 revealed that the WH1(A31V) fibril particles were efficiently internalized by the N2a cells expressing  
15 either mCherry or WH1(WT)-mCherry (Figure 3B). In the latter, fibrils co-localized with the  
16 endogenous WH1(WT)-mCherry in small, dot-like cytosolic aggregates (Figure 3B, arrows).  
17 Approximately 70% of the WH1(WT)-mCherry expressing cells displayed red puncta upon incubation  
18 with the fibres, while spontaneous foci formation of WH1(WT)-mCherry was detected in < 35% of the  
19 cells after 48 h (Figure 3C). These figures significantly differed from < 20% of foci-bearing cells  
20 counted for the mCherry control, irrespective of the presence or absence of added fibrils (Figure 3C).  
21 Overall, these observations support that induction of foci by WH1(A31V) amyloid fibres requires  
22 expression of a homologous protein substrate in the recipient cells.

23 As a consequence of amyloid templating, it can be assumed that the foci induced in mammalian cells  
24 by the internalized amyloid fibres are amyloid aggregates. In order to qualitatively assess this point, ThS  
25 staining was performed (Figure 4). Confocal microscopy images obtained after 48 h of fibre addition to  
26 the cell cultures revealed the selective binding of ThS to the induced cytosolic WH1(WT)-mCherry  
27 aggregates. On the contrary, no intense ThS staining was observed for cells expressing mCherry,  
28 attributable to background fluorescence. These findings are compatible with the results of ThS binding



1 to the intracellular aggregates generated upon transient expression of WH1(A31V)-mCherry (Figure 2).  
2 Therefore, ThS staining provides evidence for the amyloid nature of the WH1(WT)-mCherry aggregates  
3 as templated by the WH1(A31V) fibres in the cytoplasm of murine N2a cells.

4  
5 **RepA-WH1(A31V) released from murine cells can cross-seed amyloid aggregation in the cytosol**  
6 **of recipient human cells stably expressing RepA-WH1(WT)**

7 The studies described above provided evidence for the ability of WH1(A31V) to cross-seed WH1(WT)  
8 amyloidogenesis in the cytosol of mammalian cells. To further explore this, we aimed to generate stable  
9 donor cell lines in which the WH1 variants and controls, fused to the green fluorescent protein  
10 TagGFP2, could be expressed under an inducible promoter (pTRE3G Tet-ON vector, genome-  
11 integrated THN-rtTA transactivator; see Materials and Methods) (Figure S3A). We chose SH-SY5Y as  
12 the parental donor cell line as transgene expression in that background was less pronounced than in N2a  
13 cells (Figure S1B). Unfortunately, we were unable to get any clone expressing WH1(A31V)-TagGFP2,  
14 suggesting that, even under a tightly regulated gene expression, any transcriptional leak of this mutant  
15 variant results in acute cytotoxicity. For the WH1(WT)-TagGFP2 and the control TagGFP2 constructs,  
16 efficient doxycycline (Dox)-induced expression was verified through Western blot (Figure S3B) and  
17 flow cytometry (Figure S3C) analyses. Confocal microscopy imaging indicated that both the THN-  
18 rtTA/WH1(WT)-TagGFP2 and THN-rtTA/TagGFP2 double-stable clones showed an homogeneous,  
19 diffuse expression throughout the entire cytosol (Figure S3D).

20 The horizontal, cell-to-cell spreading of RepA-WH1, a key feature to qualify it as a prion-like  
21 protein (Aguzzi and Lakkaraju, 2016), was then explored. To this aim, murine N2a donor cells  
22 transiently expressing either WH1(A31V)-mCherry or WH1(WT)-mCherry (Figure 1A) were co-  
23 cultured with THN-rtTA/WH1(WT)-TagGFP2 recipient cells, which stably expressed soluble  
24 WH1(WT)-TagGFP2 upon Dox addition (Figure S3D), for a period of up to a week (Figure 5A). To  
25 control for non-specific spontaneous aggregation in the human cells, recipient cultures not mixed with  
26 donors were similarly processed in parallel. The formation of foci in the recipient cells was assessed by  
27 confocal microscopy imaging every 24 h (Figure 5B,C, left). Noticeably, small green fluorescent puncta  
28 were detected over time in the THN-rtTA/WH1(WT)-TagGFP2 recipient cells when the donor N2a cells

1 expressing the hyper-amyloidogenic variant WH1(A31V)-mCherry were added, peaking at 5 days  
2 (Figure 5C, left-bottom) and decreasing thereafter, which suggests killing of the cells. On the contrary,  
3 no substantial formation of WH1(WT)-TagGFP2 foci was observed upon addition of the N2a donors  
4 transiently expressing WH1(WT)-mCherry (Figure 5C, left-top) to the human recipient cells.  
5 Fluorescent puncta were not apparent either for their control counterparts, in which donors expressing  
6 WH1(A31V/WT)-mCherry were added to cultures of recipient cells THN-rtTA/TagGFP2 (Figure 5B,  
7 left). These results fully parallel (and strengthen) the observations made when exogenously added, *in*  
8 *vitro*-assembled WH1(A31V) fibres induced the formation of WH1(WT)-mCherry foci in the N2a cells  
9 (see above; Figure 3). Five days co-cultures were selected for quantitative image analysis of the fraction  
10 of cells that exhibited green fluorescent foci. Just 10-12% of the human control cells endogenously  
11 expressing TagGFP2 showed some fluorescent spots, irrespective of being co-cultured with murine cells  
12 expressing WH1(A31V)-mCherry or WH1(WT)-mCherry. Puncta were apparent in  $\approx$ 35% of the  
13 recipient cells expressing WH1(WT)-TagGFP2 only if the hyper-amyloidogenic WH1(A31V)-mCherry  
14 variant was expressed by the donor murine cells (Figure 5B,C, right).

15 While WH1(A31V)-mCherry aggregates must be first released (either through exocytosis or, more  
16 likely, upon cell death) to the culture medium from the donor cells and subsequently gain access into the  
17 recipient cells, it is noteworthy that red fluorescent WH1(A31V)-mCherry particles were rarely detected  
18 at the intercellular space. Although it is possible that the loss of such particles may occur during the  
19 manipulation of the samples (e.g., for cell passages or microscopy), the most likely explanation is that  
20 their size range is beyond the resolution of conventional confocal imaging (Hofmann et al., 2013; Liu et  
21 al., 2016).

22 In conclusion, these results showed significant differences in the intercellular ‘infectivity’ of soluble  
23 WH1(WT)-mCherry and hyper-amyloidogenic WH1(A31V)-mCherry. Cells suffering from the RepA-  
24 WH1(A31V) amyloidosis were highly proficient in the propagation of an aggregation-related  
25 phenotype, which was consistent with the results obtained for the *in vitro* pre-assembled RepA-  
26 WH1(A31V) fibrils. Altogether, these parallel observations suggest that the bacterial RepA-WH1  
27 protein indeed follows in mammalian cells a prion-like mechanism for horizontal transmission.  
28

1 **A proteomic outline of the cytotoxicity of RepA-WH1(A31V) amyloids in mammalian cells**  
2 In a previous study, we characterized the systems-wide response of *E. coli* to WH1(A31V)-mCherry  
3 expression to identify pathways potentially affected by the bacterial amyloidosis (Molina-García et al.,  
4 2017). To assess cellular responses to the toxic WH1(A31V) amyloids, we performed parallel proteomic  
5 studies on three groups of samples: i) N2a cells transiently expressing WH1(WT)-mCherry or mCherry,  
6 collected after 48 h of incubation with WH1(A31V) fibres (see Figure 3; Supplemental Dataset 1); ii)  
7 THN-rtTA/SH-SY5Y cells expressing WH1(WT)-TagGFP2 or TagGFP2, harvested after 5 days of  
8 induction with Dox in co-culture with N2a cells expressing WH1(A31V)-mCherry (see Figure 5;  
9 Supplemental Dataset 2); and iii) control naïve N2a or THN-rtTA/SH-SY5Y cells incubated,  
10 respectively, with WH1(A31V) fibres or WH1(A31V)-mCherry donor cells.

11 The subsets of the proteomes that were exclusively found in recipient cells expressing WH1(WT)-  
12 mCherry (N2a cells, mice) or WH1(WT)-TagGFP2 (THN-rtTA/SH-SY5Y cells, human), and not in  
13 cells just expressing their respective fluorescent tag controls, upon fibre-induced or cell-to-cell spread of  
14 amyloidogenesis reflect a broader response for latter experimental scenario (Figures 6 and S4). Albeit  
15 the individual proteins identified are not the same (perhaps also due to host species-specific features),  
16 both datasets point to shared pathways affected in the RepA-WH1 amyloidosis. These include distinct  
17 subcellular organelles, specially mitochondria and the endoplasmic reticulum, and processes, among  
18 which metabolism and signalling are the most frequent hits. Cluster analyses further refine these  
19 findings, confirming that mitochondria are at the very core of the RepA-WH1 amyloidosis under both  
20 experimental approaches (Figure S4), with Complex I of the respiratory chain (NADH:ubiquinone  
21 oxidoreductase) as the most prominent node. In addition, protein quality control machinery (the  
22 proteasome, ubiquitin-ligases and chaperones), cell signalling and intracellular trafficking networks,  
23 linked to protein secretion, are affected by WH1(A31V) uptake.

24 Interestingly, similarities between the response of mammalian mitochondria to amyloid-promoted  
25 neurodegeneration and how *E. coli* reacts to RepA-WH1 amyloidosis were previously proposed on the  
26 basis of systems analyses carried out in the latter host (Molina-García et al., 2017). The results  
27 presented here reinforce this view and make sense in light of the common ancestry of Gram-negative

1 bacteria and mitochondria, validating RepA-WH1 as a minimal, autonomous proxy to sketch core  
2 mitochondrial routes involved in human amyloidoses.

3

#### 4 **Discussion**

5 The ability of highly ordered protein aggregates to intercellularly template their amyloid structure on  
6 soluble molecules of the same protein found in naïve recipient cells has recently emerged as a hallmark  
7 of human neurodegenerative diseases. In common with the infectious propagation of the PrP prion, cell-  
8 to-cell transmission of prion-like protein aggregates has been established for  $\alpha$ -synuclein, Tau, A $\beta$   
9 peptides, and it is now being explored for many other proteins involved in neurodegeneration  
10 (Polymenidou and Cleveland, 2012; Soto, 2012; Prusiner, 2013; Goedert, 2015; Jücker and Walker,  
11 2018). The proteins involved in such aggregation cross-seeding *in vivo* are thus considered prion-like  
12 proteins or prionoids (Aguzzi and Lakkaraju, 2016; Scheckel and Aguzzi, 2018). In these cases, the  
13 intercellular traffic is likely mediated by generation of extracellular vesicles from the donor cells and  
14 subsequent endocytic uptake by the recipient cells (Liu et al., 2016).

15 RepA-WH1 is a bacterial prion-like protein that recapitulates in *E. coli* many of the essential features  
16 of an amyloid proteinopathy, including the formation of cytotoxic amyloid aggregates (Fernández-  
17 Tresguerres et al., 2010; Molina-García et al., 2017), the existence of strains that give rise to distinct  
18 phenotypes, and their epigenetic vertical (mother-to-daughter cells) transmission coupled to cell  
19 division (Gasset-Rosa et al., 2014). However, its ability to be horizontally (cell-to-cell) transmitted as a  
20 prion-like protein had not been addressed yet in bacteria, due to the stringent barrier that to the uptake of  
21 large protein aggregates impose the peptidoglycan and, in Gram-negative bacteria, also the outer  
22 membrane. We have now used mammalian cultured cells and fluorescent-labelled proteins to address  
23 the issue of the horizontal transmissibility of RepA-WH1. We first transiently expressed distinct  
24 variants of RepA-WH1 in murine cells, which led to the formation of amyloids with similar degrees of  
25 cytotoxicity to those described in bacteria, i.e., WH1(A31V) >> WH1( $\Delta$ N37) > WH1(WT) (Gasset-  
26 Rosa et al., 2014; Molina-García et al., 2017). Then incubation of those cells with *in vitro*-assembled  
27 amyloid WH1(A31V) fibres showed their ability to induce the formation of foci by WH1(WT), which is

1 otherwise soluble as expressed in the cytoplasm of the recipient cells. In a subsequent step, we  
2 generated a stable and inducible cell line expressing soluble WH1(WT), which assembled as fluorescent  
3 puncta upon exposure to WH1(A31V) particles generated by donor cells. The results from these  
4 experiments fulfil the last stalling requirement to qualify RepA-WH1 as a prion-like protein: its ability  
5 to be horizontally transmissible.

6 It is noteworthy that, under our experimental conditions, the uptake of recombinant WH1(A31V)  
7 amyloids by cells not expressing WH1(WT), but just the fluorescent proteins to which the prion-like  
8 protein was tagged, does not result in any evident toxicity for the recipient cells. Although there is no  
9 protein with a noticeable degree of sequence identity with RepA-WH1 in the human proteome (BLAST  
10 best match E-value = 0.11), it has been recently suggested that bacterial extracellular amyloids may  
11 template amyloidogenesis on human proteins implicated in neurodegeneration in spite of the lack of  
12 significant sequence similarities (Friedland and Chapman, 2017; Perov et al., 2019). This could  
13 constitute a matter of concern on the biosafety of bacterial amyloids. In contrast, the inability of  
14 WH1(A31V) amyloids to induce either intracellular aggregation or toxicity in naïve mammalian cells  
15 not expressing RepA-WH1 qualifies this protein as biosafe.

16 In the context of the experiment in which amyloidogenesis was induced by adding exogenous fibres,  
17 it is most relevant that the intracellular foci in the recipient cells were templated by a well characterized  
18 amyloid structure assembled *in vitro* (Giraldo, 2007; Torreira et al., 2015), which in turn was seeded by  
19 intracellular aggregates extracted from *E. coli* cells experiencing WH1(A31V) amyloid toxicity  
20 (Fernández-Tresguerres et al., 2010). Therefore, it can be assumed (Luk et al., 2009; Stöhr et al., 2012;  
21 Lu et al., 2013; Frederick et al., 2014; Qiang et al., 2017) that the intracellular amyloid (ThS-reactive)  
22 foci in the recipient murine cells may have the same intimate structure as the aggregates reported to kill  
23 bacterial cells.

24 The toxicity of the amyloid proteins involved in neurodegeneration can be due to the loss, on their  
25 aggregation, of an essential cellular function and/or to the gain of an emergent functionality by the  
26 aggregates (Chiti and Dobson, 2017), e.g., upon the assembly of oligomeric membrane pores  
27 (Fernández et al., 2016b). In the case of the phenotype caused in the mammalian cells by the expression  
28 of WH1(A31V) amyloids (Figures 1 and 2), or by their uptake and subsequent templating on WH1(WT)

1 in the recipient cells (Figures 3-5), cytotoxicity is necessarily an intrinsic property of the aggregates  
2 themselves, because *a priori* no function is associated with this bacterial prion-like protein in the  
3 heterologous mammalian host. Very recently, RepA-like proteins with a conserved WH1 domain (Kilic  
4 et al., 2019) have been described as nearly the only gene products encoded by small mobile genetic  
5 elements that were isolated in dairies and meat (BMMFs), with a probable origin in cattle microbiota,  
6 but also in samples from patients with cancer and multiple sclerosis (de Villiers et al., 2019). These  
7 findings open the intriguing possibility that the cytotoxicity described here for RepA-WH1 might have  
8 broader relevance in human disease.

9 Mass spectrometry analyses of the proteins specifically detected upon the uptake of RepA-  
10 WH1(A31V) under the two main scenarios of experimental transmission addressed (Figure 6) provided  
11 a picture sharing some similarities to cells in neurodegeneration. In the case of exogenous nucleation of  
12 WH1(WT) amyloids by WH1(A31V) fibres, proteins annotated as involved in neurodegenerative  
13 diseases were identified (Crat, Hexb, Pld3 and Sel11), while others were related to ubiquitin ligases and  
14 proteasome-mediated degradation pathways (Fbxo2 and Isg15). Upon the uptake of secreted/released  
15 WH1(A31V) particles, proteins linked to neurodegeneration (Arsa, Epm2aip1 and Hm13) also showed-  
16 up, together with co-chaperones (Chordc1, Dnajb4 and Dnajc11) and proteins involved in vesicular  
17 trafficking (Arfgap2, Copb2, Dis3 and Flot1) or in apoptosis (Bak, Cul1, Ier3ip1, Mfge8, Psm6, Tpp2  
18 and Stk4). It is noteworthy that the latter participates in chromatin condensation, as observed in Figure  
19 1B. Mitochondrial proteins as well as those located at the endoplasmic reticulum were the most  
20 common hits, preferentially proteins directly related with bioenergetics (respiratory chain) and with  
21 secretory pathways, respectively. Two proteins are worth noting in the context of what is known on  
22 RepA-WH1(A31V) toxicity in *E. coli*: Apool, which binds to cardiolipin, the bacterial and  
23 mitochondrial-specific acidic phospholipid that promotes the formation of pores by the prionoid in  
24 model membranes (Fernández et al., 2016b), and Romo1, a protein that enhances the formation of  
25 reactive oxygen species (ROS) in mitochondria, usually as an anti-microbial response. Romo1 might be  
26 playing the same role, albeit through a different mechanism, that the auto-oxidation of the alternative  
27 dehydrogenase NdhII plays in bacteria, i.e., constituting the first step in the oxidative cascade leading to  
28 cell death (Molina-García et al., 2017). Attempts to counteract ROS generation in mitochondria seem to

1 rely on Nnt, which generates NADPH and thus reduction power to detoxify free radicals. Interestingly,  
2 a central role in the cytotoxicity of the PrP prion has been proposed for NADPH oxidases (Sonati et al.,  
3 2013).

4 Several systems analyses, based on differential transcriptomics and proteomics, have been reported  
5 for conditions related to neurodegenerative amyloidoses (Hwang et al., 2009; Olzscha et al., 2011; Hosp  
6 et al., 2015; Woerner et al., 2016; Kim et al., 2016; Seyfried et al., 2017; Markmiller et al., 2018;  
7 Mathys et al., 2019). One-third of the proteins identified in our analysis (Figure 6) were also found  
8 among the genes overexpressed, or the proteins captured within aggregates, in those datasets, thus  
9 defining a subset of proteins (Table S1) distinctive of a ‘generic’ cellular model of amyloidosis, as it can  
10 be outlined with the synthetic bacterial prion-like RepA-WH1 protein.

11

## 12 **Materials and Methods**

### 13 **Plasmid Constructions**

#### 14 **Generation of the pcDNA3.1 vectors**

15 The gene fusions *repA-WH1(WT)-mCherry*, *repA-WH1(A31V)-mCherry* and *repA-WH1( $\Delta$ N37)-*  
16 *mCherry*, or *mCherry* were amplified by PCR (5'-CCGGGTACCATGGGCAGCAGCCATCATC and  
17 5'-CGGGAATTCTTACTTGTACAGCTCGTCCAT primers; Pfu DNA polymerase, Promega) from  
18 the pRGrectac-NHis constructions (Fernández-Tresguerres et al., 2010). The PCR products were cloned  
19 into pcDNA3.1 (Invitrogen) after cutting with KpnI (5' end) and EcoRI (3' end) (Fig. S1A). Constructs  
20 were screened by colony PCR and restriction enzyme digestion, and confirmed by Sanger sequencing  
21 (Secugen: <https://www.secugen.es>).

#### 22 **Generation of the pTRE3G vectors**

23 For generation of SH-SY5Y stable cell lines expressing WH1(WT)-TagGFP2, or TagGFP2 as a control,  
24 the *TagGFP2* sequence of the pTagGFP2-N vector (Evrogen) was amplified via PCR (5'-  
25 ATAAGAATTCCGGAATGAGCGGGGGCGAGGAG and 5'-  
26 CGGGGAATTCCATATGTTACCTGTACAGCTC primers) and cloned into pcDNA3.1-mCherry (see  
27 above) via BspEI and EcoRI digestions, thus replacing the red by the green fluorescent protein. The



1 RepA-WH1(WT) domain was then excised from pcDNA3.1-*WH1(WT)-mCherry* and fused in frame  
2 with TagGFP2 by digestion with SacII and BspEI.

3 For the Tet-ON inducible expression plasmid pTRE3G (Clontech), *WH1(WT)-TagGFP2* and *TagGFP2*  
4 genes were amplified by PCR (5'-GAAGATCTATGGGCAGCCATCATCATCA and 5'-  
5 CCGGAATTCCATATGTTACCTGTACAGCCTC primers). The amplified PCR fragments were  
6 subcloned into pTRE3G with BglIII and NdeI to obtain pTRE3G-*TagGFP2* and pTRE3G-*WH1(WT)-*  
7 *TagGFP2* (Fig. S3A).

### 8 **Generation of pET-*WH1(A31V,K132C)***

9 For labelling the protein RepA-WH1(A31V) with Alexa Fluor 488, a variant with only one cysteine was  
10 constructed. The gene *repA-WH1(A31V)* was amplified from a mutant variant in which Cys29 and  
11 Cys106 had been replaced by serines (Diederix et al., 2008), and a new C-terminal cysteine was added  
12 replacing Lys in position 132, using the following primer: 5'-  
13 GCTAAGCTTCAACAGAGCTGATAGCTGGTGAAGCTC. The *repA-WH1(A31V,K132C)* gene  
14 was interchanged with the insert in pET3d-*repA-WH1* (Fernández and Giraldo, 2018) upon digestion  
15 with SacII and BamHI.

16

## 17 **Protein Biochemistry**

### 18 **RepA-WH1(A31V) protein purification**

19 The RepA-WH1(A31V) protein used in the fibrillation studies was purified as described in (Giraldo,  
20 2007). RepA-WH1(A31V, K132C) was expressed in *E. coli* BL21(DE3) bearing pET-  
21 *WH1(A31V,K132C)*, plus pLysS to enable endogenous lysozyme-promoted lysis after freezing–thawing.  
22 Cells were grown in Terrific Broth medium supplemented with ampicillin (Ap) to 100 µg·ml<sup>-1</sup> at 30 °C  
23 to an OD<sub>600nm</sub> of 0.8. Then, IPTG was supplied to 0.5 mM and expression proceeded for 6 h at room  
24 temperature (RT). Cells were harvested and protocol was followed as described (Giraldo, 2007). The  
25 concentration of purified protein was determined by absorption at 280 nm ( $\epsilon^{280} = 11,548 \text{ M}^{-1}\cdot\text{cm}^{-1}$ ).

### 26 **Fluorescent labelling of RepA-WH1**

1 The single cysteine residue in RepA-WH1(A31V,K132C) was labelled with Alexa Fluor 488 maleimide  
2 (Invitrogen) using thiol chemistry. Briefly, the protein (~50  $\mu$ M) was dialyzed against 20 mM of sodium  
3 phosphate buffer pH 7.0 and 100 mM Na<sub>2</sub>SO<sub>4</sub>. After dialysis, TCEP [tris(2-carboxyethyl) phosphine-  
4 hydrochloride] to 2 mM and urea to 2 M were added and incubated for 1 h on ice. TCEP maintains the  
5 cysteine residue in a reduced form, available for derivatization. The fluorophore was prepared by  
6 dissolving 250  $\mu$ g in 10  $\mu$ l H<sub>2</sub>O and added dropwise to the protein solution while gently agitated in a  
7 small vial. We used 5-fold molar excess of the dye to protein at 50  $\mu$ M. From this point onwards, the  
8 sample was protected from light using aluminium foil. The conjugation reaction was allowed to proceed  
9 at RT for 4 h under mild agitation. After protein labelling, unconjugated Alexa Fluor 488 was separated  
10 in a 5 mL desalting column (GE Healthcare). Sample was divided into aliquots, flash frozen in N<sub>2</sub>(l),  
11 and stored at -70°C after adding glycerol to 10%. Each aliquot was thawed immediately before the  
12 experiment and used only once. The fraction of protein labelled was 20% (i.e., ~0.2 moles of dye per  
13 mole of protein).

#### 14 **Fibre assembly**

15 Fibres were prepared with a modification of the protocol described in (Giraldo et al., 2007; Torreira et  
16 al., 2015). 25  $\mu$ M of RepA-WH1(A31V) and 0.5  $\mu$ M of Alexa 488-labelled RepA-WH1(A31V,K132C)  
17 were mixed in a final reaction volume of 100  $\mu$ l of 0.1 M Na<sub>2</sub>SO<sub>4</sub>, 4 mM MgSO<sub>4</sub>, 40 mM HEPES pH 8  
18 and 7% PEG-4000. 1  $\mu$ l (diluted 1:100 from the stock) of purified intracellular RepA-WH1(A31V)-  
19 mCherry inclusions were added to nucleate amyloid assembly (Fernández-Tresguerres et al., 2010).  
20 Fibres were formed in 500  $\mu$ l Eppendorf tubes at 4°C for 20 days. For cellular uptake experiments,  
21 fibres were centrifuged at 13,000 rpm for 30 min. After centrifugation, the supernatant was removed and  
22 fibres were washed with buffer (50 mM Na<sub>2</sub>SO<sub>4</sub>, 40 mM HEPES pH 8) and centrifuged again to be  
23 finally resuspended in the same buffer. To get a more efficient internalization, immediately before  
24 incubation with cells, fibres were fragmented by 5 min sonication in a water bath (Ultrasonic cleaner  
25 USC100T, 60W), and further broken up by pipetting with a 100  $\mu$ l Hamilton syringe for 2 min. Fibres  
26 were checked by means of electron microscopy (Fig. S2A), as indicated in (Giraldo, 2007; Fernández et  
27 al., 2016b), and confocal microscopy (Fig. S2B; see below). The size distribution of the fibres as added  
28 to the cell cultures was  $257.6 \pm 188.0$  nm (n= 243).

## 1 **Whole cell protein extraction**

2 Either transiently transfected N2a or stable SH-SY5Y cells (see below) were rinsed in PBS, detached by  
3 scraping and harvested by centrifugation at 2,000 rpm, for 5 min at 4°C. Cell pellets were resuspended  
4 in 100 µl of RIPA buffer (Sigma), supplemented with protease and phosphatase inhibitors (Roche),  
5 incubated on ice for 30 min and then centrifuged at 14,000 rpm for 5 min at 4 °C. Pellets and  
6 supernatants were kept frozen at -80°C. Cell lysate supernatants were denatured with Laemmli buffer  
7 for 5 min at 95 °C and samples were loaded (30 µg total protein per lane) onto 12.5% SDS-denaturing  
8 polyacrylamide gels. Western blot analysis was performed after semi-dry transference of SDS-PAGE  
9 gels to PVDF membranes, using mouse anti-GFP (1:1,000; Abcam), or rabbit anti-mCherry (1:5,000;  
10 Abcam) antibodies, and anti-actin (1:1,000; Abcam) or anti-vinculin (1:1,000; Sigma) antibodies as  
11 loading controls. Then membranes were incubated with HRP-conjugated secondary anti-mouse/rabbit  
12 antibodies (1:10,000; Sigma). Blots were developed with ECL (Pierce).

13

## 14 **Cell Biology**

### 15 **Cell cultures**

16 The murine neuroblastoma cell line Neuro 2a (N2a; DSMZ-Germany), and the human HeLa (DSMZ)  
17 and neuroblastoma SH-SY5Y (CIB-CSIC stock) cell lines were cultured in Dulbecco's Modified Eagle  
18 Medium: nutrient Mixture F-12 (DMEM-F12) (Gibco) supplemented with 10% tetracycline-free fetal  
19 bovine serum (FBS) (Capricorn), 200 mM glutamine (Gibco) and 1% penicillin/streptomycin (Gibco).  
20 For the selection and maintenance of SH-SY5Y stable clones, geneticin (Gibco) and hygromycin B  
21 (Clontech) were added to the medium. Tet-ON expression was induced by doxycycline (Sigma). Cells  
22 culture was carried out at 37 °C in a humidified 5% CO<sub>2</sub> incubator. Every 3-4 days, cells were grown to  
23 near confluence (80-90% density) and then detached using 0.05% trypsin-EDTA (Gibco) for  
24 subculturing.

### 25 **N2a cells transfection**

26 N2a cells were transiently transfected at ≈70% confluence in a 6-well plate by adding per well 10 µL  
27 Lipofectamine 2000 (Invitrogen) together with 3 µg of the respective pcDNA3.1 plasmid derivative.

1 DNA-Lipofectamine complexes were prepared according to the manufacturer's protocol in serum-free  
2 DMEM-F12 medium. Protein expression was followed by Western-blot analysis (Fig. S1B; see above)  
3 and confocal microscopy (see below).

#### 4 **Uptake of amyloid fibrils by N2a cells**

5 To assay the uptake of the *in vitro* pre-assembled RepA-WH1(A31V)-Alexa 488 labelled fibres by the  
6 N2a cell line, cells were seeded in 35 mm plates and transiently transfected with pcDNA3.1-*repA*-  
7 *WH1(WT)-mCherry*, expressing a soluble variant of RepA-WH1 (Fernández-Tresguerres et al., 2010;  
8 Molina-García and Giraldo, 2014), or pcDNA3.1-*mCherry* as a control (see above; Fig. S1A).

9 Immediately after transfection, N2a cells were exposed to RepA-WH1(A31V)-Alexa 488 fibres (1 µM  
10 in equivalent protein monomers) in the growth medium. Next day, cells were extensively rinsed with  
11 PBS and further cultured in fresh medium. Fluorescence was subsequently monitored by confocal  
12 microscopy 24, 48 and 72 h after the exposure to the fibres.

#### 13 **Generation of stable and Tet-ON regulated expression cell lines**

14 To stably express RepA-WH1(WT)-TagGFP2 and TagGFP2 in the SH-SY5Y cell line, the Tet-ON 3G  
15 expression system (Clontech) was used. It is composed of pCMV-*Tet3G* (regulatory) and pTRE3G  
16 (response) plasmids. To generate SH-SY5Y cells expressing the trans-activator protein (rtTA) upon  
17 genomic integration of pCMV-*Tet3G*, 1 µg of this plasmid was transfected into 5x10<sup>5</sup> SH-SY5Y cells  
18 with Lipofectamine LTX PLUS (1:1 ratio; Invitrogen) and selected for colonies with G418 (0.5 mg/ml).  
19 Individual clones, isolated using a cloning cylinder (Sigma), were then screened for luciferase activity  
20 (see below). Suitable THN-rtTA/SH-SY5Y clones (i.e., those with high luciferase induction and low  
21 basal expression) were subsequently co-transfected with a mixture (10:1) of pTRE3G-*WH1(WT)*-  
22 *TagGFP2* (or pTRE3G-*TagGFP2*) and a hygromycin linear selection marker. Double-stable SH-SY5Y  
23 transfectants were then selected by screening with hygromycin (0.4 mg/ml) and G418 (0.5 mg/ml) for 2  
24 weeks, testing for the best expression of *repA-WH1(WT)-TagGFP2* and *TagGFP2* genes in the  
25 presence/absence of doxycycline (0.5 µg/ml) after 48 h by Western-blot (Fig. S3B; see above), flow  
26 cytometry (Fig. S3C) and confocal microscopy (Fig. S3D) (see below).

#### 27 **Luciferase assay**

28 The luciferase assay kit (Promega) was used to test the expression and regulation performance of the

1 selected transactivator-positive clones. Specifically, G418 resistant THN-rtTA/SH-SY5Y clones were  
2 seeded in a 6-well culture plate at a density of  $5 \times 10^5$  cells/well. One day after seeding, cells were  
3 transiently transfected with 5  $\mu\text{g}$  of the pTRE3G-Luc control vector (Clontech) using Lipofectamine  
4 LTX (see above). Luciferase expression was induced by adding 0.5  $\mu\text{g}/\text{ml}$  doxycycline for 48 h to  
5 complete DMEM-F12 medium. In parallel, to test clones for basal luciferase expression, controls with  
6 no doxycycline supplied were casted. Thereafter, cells were harvested in RIPA lysis buffer and  
7 bioluminescence was monitored at 562 nm using a TD-20/20 Turner Designs luminometer.

### 8 **N2a/SH-SY5Y co-cultures**

9 To explore cell-to-cell transmissibility of protein particles, SH-SY5Y stable cells (recipient cells),  
10 expressing either soluble WH1(WT)-TagGFP2 or TagGFP2, were seeded on glass coverslips coated  
11 with 0.1 mg/ml poly-L-lysine (Sigma) and casted in 24-well plates. Twenty-four h afterwards, N2a cells  
12 (donor cells) transiently transfected with pcDNA3.1-*WH1(A31V)-mCherry* or pcDNA3.1-*WH1(WT)-*  
13 *mCherry* were detached with trypsin and transferred to the plates bearing the SH-SY5Y receptor cells  
14 (2:1 ratio) and co-cultured for 5 days in DMEM-F12 completed media with 0.5  $\mu\text{g}/\text{ml}$  doxycycline.  
15 Cells were then fixed with 4% p-formaldehyde (PFA) during 15 min and stained with DAPI (5 min, 1  
16  $\mu\text{g}/\text{ml}$  in PBS; Merck-Millipore).

### 17 **Flow cytometry**

18 Flow cytometry was used to monitor fluorescent protein expression in the stable clones for rtTA  
19 transactivator, either in the presence or absence of 0.5  $\mu\text{g}/\text{ml}$  doxycycline, at 48 h after induction. Cells  
20 were detached by trypsinization from 35 mm culture dishes and centrifuged at 1,000 rpm for 5 min at  
21 4°C. Then, pellets were resuspended in 2 ml of cold PBS buffer. GFP (Excitation/Ex 488 nm;  
22 Emission/Em 525 nm) fluorescence was measured in a Coulter Epics XL (Beckman-Coulter) flow  
23 cytometer, analysing 10,000 cells per sample. Subsequent data analysis was performed using the  
24 Flowlogic software (v7.2.1).

### 25 **Cell proliferation (MTT) assay**

26 To assess cell proliferation, N2a cells transfected with pcDNA3.1-*WH1( $\Delta$ WT/ $\Delta$ 31V/ $\Delta$ N37)-mCherry*, as  
27 described above, were seeded 24 h after transfection into 96-well culture plates at a density of  $6 \times 10^4$   
28 cells/well. The next day, MTT (thiazolyl blue tetrazolium bromide, Sigma; 0.5 mg/ml in PBS) was

1 supplied and, after 4 h of incubation at 37°C, MTT was removed and replaced with 200 µl of DMSO.  
2 Absorbance was measured at 570 nm in a Varioskan Flash plate reader (Thermo Fisher Scientific).  
3 Absorbance values were normalized to those obtained in DMSO.

#### 4 **Confocal microscopy**

5 Cells were directly observed at RT by confocal laser microscopy using a Leica TCS-SP5 microscope  
6 with a 63x (NA = 1.4–0.60/Oil HCX PL APO) immersion objective. Laser lines used for excitation  
7 were 514 nm (mCherry), 488 nm (Alexa 488 and Tag GFP2) and 405 nm (DAPI and ThS). Images were  
8 acquired every 1 µm (Z-sections). Cells were fixed with 4% PFA in PBS for 15 min, rinsed three times  
9 in PBS and nuclei staining, when required, was performed with 1 µg/ml DAPI solution (Merck-  
10 Millipore) in PBS for 10 min, then rinsed three times with PBS. Coverslips were mounted with  
11 Fluoromount-G medium (SouthernBiotech) on microscopic slides (Linealab). For amyloid  
12 characterization of intracellular particles, transiently transfected N2a cells were grown on coverslips  
13 coated with poly-L-lysine for 48 h. Cells were fixed with 4% PFA in PBS for 20 min and rinsed as  
14 above. Then, cells were permeabilized with cold 50% methanol (Emsure) in Milli-Q H<sub>2</sub>O for 5 min,  
15 incubated with 0.05% thioflavin-S (ThS, Sigma) in 12.5% ethanol for 30 min and rinsed three times in  
16 50% ethanol in distilled H<sub>2</sub>O. Cells were then hydrated for 5 min in PBS and mounted.

#### 17 **Statistical analysis**

18 All experiments were carried out in triplicate. GraphPath PRISM (v.6) software was used to estimate the  
19 media and standard deviation of data points, and for the analysis of their statistical significance, either  
20 through the Student's *t*-test or one-way ANOVA.

21

#### 22 **Proteomics**

##### 23 **LC-MS analysis**

24 The following cell types were studied: i) N2a cells transfected with pcDNA3.1-*WH1(WT)*-*mCherry* or  
25 pcDNA3.1-*mCherry*, and incubated with *in vitro*-assembled WH1(A31V) fibres for 48 h; ii) THN-  
26 rtTA/SH-SY5Y cells having integrated pTRE3G-*WH1(WT)*-*TagGFP2* or pTRE3G-*TagGFP2*, both  
27 after induction with Dox (0.5 µg/ml) for 48 h; and iii) naïve N2a and THN-rtTA/SH-SY5Y control cells  
28 co-cultivated as in (i) and (ii). Whole cell extracts (see above) were partially resolved by SDS-PAGE

1 gel (10% polyacrylamide), so that the whole proteome became concentrated in the stacking/resolving  
2 gel interface. The unresolved protein bands were visualized by Colloidal Blue Staining (Invitrogen),  
3 excised into pieces (1 x 1 mm), and placed in 0.5 ml tubes and subjected to manual tryptic digestion  
4 (Cristobo et al., 2001). The eluted tryptic peptides were dried by speed-vacuum centrifugation and then  
5 desalted through ZipTip C18 Pipette tips (Millipore/Sigma-Aldrich). Samples were reconstituted in 10  
6  $\mu$ L of 0.1% formic acid before their analysis by nLC–MS/MS. All peptide separations were carried out  
7 on an Easy-nLC 1000 nanosystem (Thermo Fisher Scientific). For each analysis, the sample was loaded  
8 into an Acclaim PepMap 100 precolumn (Thermo Fisher Scientific) and eluted through a RSLC  
9 PepMap C18 column (50 cm long, 75  $\mu$ m inner diameter and 2  $\mu$ m particle size; Thermo Scientific).  
10 The mobile phase was 0.1% formic acid in water (solvent A) and 0.1% formic acid in acetonitrile  
11 (solvent B). The gradient profile was set, at a flow rate of 300 nL/min, as follows: 5–35% solvent B for  
12 100 min, 35%–45% solvent B for 20 min, 45%–100% solvent B for 5 min, and 100% solvent B for 15  
13 min. Four microliters of each sample were injected. MS analysis was performed using a Q-Exactive  
14 mass spectrometer (Thermo Scientific). Ionization was performed at 2,000 V of liquid junction voltage  
15 and a capillary temperature of 270 °C. The full scan method comprised a m/z 300–1800 mass selection,  
16 an Orbitrap resolution of 70,000 (at m/z 200), a target automatic gain control (AGC) value of  $3 \times 10^6$ , and  
17 100 ms of maximum injection time. After the survey scan, the 15 most intense precursor ions were  
18 selected for MS/MS fragmentation. Fragmentation was performed with a normalized collision energy of  
19 27 and MS/MS scans were acquired with a starting mass of m/z 200,  $2 \times 10^5$  AGC target, a resolution of  
20 17,500 (at m/z 200),  $8 \times 10^3$  of intensity threshold, 2.0 m/z units as isolation window and 100 ms  
21 maximum IT. Charge state screening was enabled to reject unassigned, singly charged and  $\geq 7$   
22 protonated ions. A dynamic exclusion time of 30 s was used to discriminate against previously selected  
23 ions.

#### 24 **MS data analysis**

25 MS data were analyzed with Proteome Discoverer (version 1.4.1.14) (Thermo) using standardized  
26 workflows. Mass spectra \*.raw files were searched either against the *Mus musculus* SwissProt 2016  
27 database (16,838 protein entries; for the N2a recipient cells), or the *Homo sapiens* SwissProt 2016  
28 database (20,131 protein entries; for the SH-SY5Y recipient cells), using the Mascot search engine



1 (v.2.6, Matrix Science). In the latter case, limiting the survey to the human proteome excluded proteins  
2 potentially coming from the donor murine cells. Precursor and fragment mass tolerance were set to 10  
3 ppm and 0.02 Da, respectively, allowing 2 missed cleavages, carbamido methylation of cysteines as a  
4 fixed modification, and methionine oxidation and acetylation N-terminal as a variable modification.  
5 Identified peptides were filtered using Percolator algorithm with a q-value threshold of 0.01 (High  
6 Confidence Filter settings, FDR < 1%) (Käll et al., 2007). Proteins contributing peptides detected at  
7 least two times (PSM >1) or having more than one peptide identified were selected for further analysis.  
8 Proteins identified in naïve N2a murine control cells when co-cultured with fibres were subtracted from  
9 those found in N2a cells expressing WH1(WT)-mCherry or mCherry and also incubated with fibres.  
10 Proteins found in naïve human THN-rtTA/SH-SY5Y control cells co-cultured with murine cells  
11 donating WH1(A31V)-mCherry were subtracted from those in THN-rtTA/SH-SY5Y cells expressing  
12 WH1(WT)-TagGFP2 or TagGFP2 and also co-cultured with the murine donor cells. A Boolean algebra  
13 analysis (Venny, v.2.1; <https://bioinfogp.cnb.csic.es/tools/venny/>) was undertaken to identify those host  
14 proteins found differentially under each experimental condition. The subset of proteins present in the  
15 WH1(WT)-mCherry/TagGFP2 datasets solely upon incubation with the WH1(A31V) fibres/donor cells  
16 were then classified according to functional gene ontology (GO) (GeneCards; Stelzer et al., 2010) and  
17 cluster analysis (STRING v.11; Szklarczyk et al., 2019).

18

## 19 **References**

- 20 Aguzzi A, Falsig J. 2012. Prion propagation, toxicity and degradation. *Nature Neuroscience* **15**:936–  
21 939. DOI: 10.1038/nn.3120.
- 22 Aguzzi A, Lakkaraju AKK. 2016. Cell Biology of Prions and Prionoids: A Status Report. *Trends in Cell*  
23 *Biology* **26**:40–51. DOI: 10.1016/j.tcb.2015.08.007.
- 24 Chiti F, Dobson CM. 2017. Protein Misfolding, Amyloid Formation, and Human Disease: A Summary  
25 of Progress Over the Last Decade. *Annual Review of Biochemistry* **86**:27–68. DOI: 10.1146/annurev-  
26 biochem-061516-045115.

- 1 Clavaguera F, Bolmont T, Crowther RA, Abramowski D, Frank S, Probst A, Fraser G, Stalder AK,  
2 Beibel M, Staufenbiel M, Jucker M, Goedert M, Tolnay M. 2009. Transmission and spreading of  
3 tauopathy in transgenic mouse brain. *Nature Cell Biology* **11**:909–913. DOI: 10.1038/ncb1901.
- 4 Cristobo I, Larriba MJ, de los Ríos V, García F, Muñoz A, Casal JI. 2011. Proteomic analysis of 1 $\alpha$ ,25-  
5 dihydroxyvitamin D3 action on human colon cancer cells reveals a link to splicing regulation. *J*  
6 *Proteomics* **75**:384–397. DOI: 10.1016/j.jprot.2011.08.003.
- 7 de Villiers EM, Gunst K, Chakraborty D, Ernst C, Bund T, Zur Hausen H. 2019. A specific class of  
8 infectious agents isolated from bovine serum and dairy products and peritumoral colon cancer tissue.  
9 *Emerging Microbes & Infections* **8**:1205–1218. DOI: 10.1080/22221751.2019.1651620.
- 10 Diederix RE, Dávila C, Giraldo R, Lillo MP. 2008. Fluorescence studies of the replication initiator  
11 protein RepA in complex with operator and iteron sequences and free in solution. *FEBS Journal*  
12 **275**:5393–5407. DOI: 10.1111/j.1742-4658.2008.06669.x.
- 13 Duernberger Y, Liu S, Riemschoss K, Paulsen L, Bester R, Kuhn PH, Schölling M, Lichtenthaler SF,  
14 Vorberg I. 2018. Prion replication in the mammalian cytosol: Functional regions within a prion  
15 domain driving induction, propagation, and inheritance. *Molecular and Cellular Biology* **38**:e00111-  
16 18. DOI: 10.1128/MCB.00111-18.
- 17 Eisele YS, Obermüller U, Heilbronner G, Baumann F, Kaeser SA, Wolburg H, Walker LC, Staufenbiel  
18 M, Heikenwalder M, Jucker M. 2010. Peripherally applied Abeta-containing inoculates induce  
19 cerebral beta-amyloidosis. *Science* **330**:980–982. DOI: 10.1126/science.1194516.
- 20 Eisenberg DS, Sawaya MR. 2017. Structural studies of amyloid proteins at the molecular level. *Annual*  
21 *Review of Biochemistry* **86**:69–95. DOI: 0.1146/annurev-biochem-061516-045104.
- 22 Fernández C, Giraldo R. 2018. Modulation of the aggregation of the prion-like protein RepA-WH1 by  
23 chaperones in a cell-free expression system and in cytomimetic lipid vesicles. *ACS Synthetic Biology*  
24 **7**:2087–2093. DOI: 10.1021/acssynbio.8b00283.
- 25 Fernández C, González-Rubio G, Langer J, Tardajos G, Liz-Marzán LM, Giraldo R, Guerrero-Martínez  
26 A. 2016a. Nucleation of amyloid oligomers by RepA-WH1 prionoid-functionalized gold nanorods.  
27 *Angewandte Chemie International Edition* **55**:11237–11241. DOI: 10.1002/anie.201604970.

- 1 Fernández C, Núñez-Ramírez R, Jiménez M, Rivas G, Giraldo R. 2016b. RepA-WH1, the agent of an  
2 amyloid proteinopathy in bacteria, builds oligomeric pores through lipid vesicles. *Scientific Reports*  
3 **6**:23144. DOI: 10.1038/srep23144.
- 4 Fernández-Tresguerres ME, Moreno-Díaz de la Espina S, Gasset-Rosa F, Giraldo R. 2010. A DNA-  
5 promoted amyloid proteinopathy in *Escherichia coli*. *Molecular Microbiology* **77**:1456–1469. DOI:  
6 10.1111/j.1365-2958.2010.07299.x.
- 7 Frederick KK, Debelouchina GT, Kayatekin C, Dorminy T, Jacavone AC, Griffin RG, Lindquist S.  
8 2014. Distinct prion strains are defined by amyloid core structure and chaperone binding site  
9 dynamics. *Chemistry & Biology* **21**:295–305. DOI: 10.1016/j.chembiol.2013.12.013.
- 10 Friedland RP, Chapman MR. 2017. The role of microbial amyloid in neurodegeneration. *PLoS*  
11 *Pathogens* **13**:e1006654. DOI 10.1371/journal.ppat.1006654.
- 12 Frost B, Jacks RL, Diamond MI. 2009. Propagation of tau misfolding from the outside to the inside of a  
13 cell. *Journal of Biological Chemistry* **284**:12845–12852. DOI: 10.1074/jbc.M808759200.
- 14 Garrity SJ, Sivanathan V, Dong J, Lindquist S, Hochschild A. 2010. Conversion of a yeast prion protein  
15 to an infectious form in bacteria. *Proceedings of the National Academy of Sciences of the United*  
16 *States of America* **107**:10596–10601. DOI: 10.1073/pnas.0913280107.
- 17 Gasset-Rosa F, Coquel AS, Moreno-del Álamo M, Chen P, Song X, Serrano AM, Moreno-Díaz de la  
18 Espina S, Lindner AB, Giraldo R. 2014. Direct assessment in bacteria of prionoid propagation and  
19 phenotype selection by Hsp70 chaperone. *Molecular Microbiology* **91**:1070–1087. DOI:  
20 10.1111/mmi.12518.
- 21 Gasset-Rosa F, Giraldo R. 2015. Engineered bacterial hydrophobic oligopeptide repeats in a synthetic  
22 yeast prion, [REP-PSI<sup>+</sup>]. *Frontiers in Microbiology* **6**:311. DOI: 10.3389/fmicb.2015.00311.
- 23 Giraldo R, Fernández-Tornero C, Evans PR, Díaz-Orejas R, Romero A. 2003. A conformational switch  
24 between transcriptional repression and replication initiation in the RepA dimerization domain.  
25 *Nature Structural Biology* **10**:565–571. DOI: 10.1038/nsb937.
- 26 Giraldo R. 2007. Defined DNA sequences promote the assembly of a bacterial protein into distinct  
27 amyloid nanostructures. *Proceedings of the National Academy of Sciences of the United States of*  
28 *America* **104**:17388–17393. DOI: 10.1073/pnas.0702006104.

- 1 Giraldo R. 2019. Optogenetic navigation of routes leading to protein amyloidogenesis in bacteria.  
2 *Journal of Molecular Biology* **431**:1186–1202. DOI: 10.1016/j.jmb.2019.01.037.
- 3 Goedert M. 2015. Alzheimer's and Parkinson's diseases: The prion concept in relation to assembled A $\beta$ ,  
4 tau, and  $\alpha$ -synuclein. *Science* **349**:1255555. DOI: 10.1126/science.1255555.
- 5 Goedert M, Eisenberg DS, Crowther RA. 2017. Propagation of Tau Aggregates and Neurodegeneration.  
6 *Annual Review of Neuroscience* **40**:189–210. DOI: 10.1146/annurev-neuro-072116-031153.
- 7 Haelterman NA, Yoon WH, Sandoval H, Jaiswal M, Shulman JM, Bellen HJ. 2014. A mitocentric view  
8 of Parkinson's disease. *Annual Review Neuroscience* **37**:137–159. doi: 10.1146/annurev-neuro-  
9 071013-014317.
- 10 Hofmann JP, Denner P, Nussbaum-Krammer C, Kuhn PH, Suhre MH, Scheibel T, Lichtenthaler SF,  
11 Schätzl HM, Bano D, Vorberg IM. 2013. Cell-to-cell propagation of infectious cytosolic protein  
12 aggregates. *Proceedings of the National Academy of Sciences of the United States of America*  
13 **110**:5951–5956. DOI: 10.1073/pnas.1217321110.
- 14 Hosp F, Vossfeldt H, Heinig M, Vasiljevic D, Arumughan A, Wyler E, GERAD1 Consortium,  
15 Landthaler M, Hubner N, Wanker EE, Lannfelt L, Ingelsson M, Lalowski M, Voigt A, Selbach M.  
16 2015. Quantitative interaction proteomics of neurodegenerative disease proteins. *Cell Reports*  
17 **11**:1134–1146. DOI: 10.1016/j.celrep.2015.04.030.
- 18 Hwang D, Lee IY, Yoo H, Gehlenborg N, Cho JH, Petritis B, Baxter D, Pitstick R, Young R, Spicer D,  
19 Price ND, Hohmann JG, Dearmond SJ, Carlson GA, Hood LE. 2009. A systems approach to prion  
20 disease. *Molecular Systems Biology* **5**:252. DOI: 10.1038/msb.2009.10.
- 21 Jucker M, Walker LC. 2018. Propagation and spread of pathogenic protein assemblies in  
22 neurodegenerative diseases. *Nature Neuroscience* **21**:1341–1349. DOI: 10.1038/s41593-018-0238-6.
- 23 Käll L, Canterbury JD, Weston J, Noble WS, MacCoss MJ. 2007. Semi-supervised learning for peptide  
24 identification from shotgun proteomics datasets. *Nature Methods* **4**:923–925. DOI:  
25 10.1038/nmeth1113.
- 26 Kfoury N, Holmes BB, Jiang H, Holtzman DM, Diamond MI. 2012. Trans-cellular propagation of Tau  
27 aggregation by fibrillar species. *Journal of Biological Chemistry* **287**:19440–19451. DOI:  
28 10.1074/jbc.M112.346072.

- 1 Kilic T, Popov AN, Burk-Körner A, Koromysova A, Zur Hausen H, Bund T, Hansman GS. 2019.  
2 Structural analysis of a replication protein encoded by a plasmid isolated from a multiple sclerosis  
3 patient. *Acta Crystallographica D* **75**:498–504. DOI: 10.1107/S2059798319003991.
- 4 Kim YE, Hosp F, Frottin F, Ge H, Mann M, Hayer-Hartl M, Hartl FU. 2016. Soluble Oligomers of  
5 PolyQ-Expanded Huntingtin Target a Multiplicity of Key Cellular Factors. *Molecular Cell* **63**:951-  
6 964. DOI: 10.1016/j.molcel.2016.07.022.
- 7 Kordower JH, Chu Y, Hauser RA, Freeman TB, Olanow CW. 2008. Lewy body-like pathology in long-  
8 term embryonic nigral transplants in Parkinson's disease. *Nature Medicine* **14**:504–506. DOI:  
9 10.1038/nm1747.
- 10 Krammer C, Kryndushkin D, Suhre MH, Kremmer E, Hofmann A, Pfeifer A, Scheibel T, Wickner RB,  
11 Schätzl HM, Vorberg I. 2009. The yeast Sup35NM domain propagates as a prion in mammalian  
12 cells. *Proceedings of the National Academy of Sciences of the United States of America* **106**:462–  
13 467. DOI: 10.1073/pnas.0811571106.
- 14 Liu S, Hossinger A, Hofmann JP, Denner P, Vorberg IM. 2016. Horizontal transmission of cytosolic  
15 Sup35 prions by extracellular vesicles. 2016. *mBio* **7**:e00915-16. DOI: 10.1128/mBio.00915-16.
- 16 Lu JX, Qiang W, Yau WM, Schwieters CD, Meredith SC, Tycko R. 2013. Molecular structure of  $\beta$ -  
17 amyloid fibrils in Alzheimer's disease brain tissue. *Cell* **154**:1257–1268. DOI:  
18 10.1016/j.cell.2013.08.035.
- 19 Luk KC, Kehm VM, Zhang B, O'Brien P, Trojanowski JQ, Lee VM. 2012. Intracerebral inoculation of  
20 pathological  $\alpha$ -synuclein initiates a rapidly progressive neurodegenerative  $\alpha$ -synucleinopathy in  
21 mice. *Journal of Experimental Medicine* **209**:975–986. DOI: 10.1084/jem.20112457.
- 22 Luk KC, Song C, O'Brien P, Stieber A, Branch JR, Brunden KR, Trojanowski JQ, Lee VM. 2009.  
23 Exogenous alpha-synuclein fibrils seed the formation of Lewy body-like intracellular inclusions in  
24 cultured cells. *Proceedings of the National Academy of Sciences of the United States of America*  
25 **106**:20051–20056. DOI: 10.1073/pnas.0908005106.
- 26 Markmiller S, Soltanieh S, Server KL, Mak R, Jin W, Fang MY, Luo EC, Krach F, Yang D, Sen A,  
27 Fulzele A, Wozniak JM, Gonzalez DJ, Kankel MW, Gao FB, Bennett EJ, Lécuyer E, Yeo GW.

- 1           2018. Context-Dependent and Disease-Specific Diversity in Protein Interactions within Stress  
2           Granules. *Cell* **172**:590–604. DOI: 10.1016/j.cell.2017.12.032.
- 3           Mathys H, Davila-Velderrain J, Peng Z, Gao F, Mohammadi S, Young JZ, Menon M, He L, Abdurrob  
4           F, Jiang X, Martorell AJ, Ransohoff RM, Hafler BP, Bennett DA, Kellis M, Tsai LH. 2019. Single-  
5           cell transcriptomic analysis of Alzheimer's disease. *Nature* **570**:332–337. DOI: 10.1038/s41586-019-  
6           1195-2.
- 7           Molina-García L, Gasset-Rosa F, Moreno-del Álamo M, Fernández-Tresguerres ME, Moreno-Díaz de  
8           la Espina S, Lurz R, Giraldo R. 2016. Functional amyloids as inhibitors of plasmid DNA replication.  
9           *Scientific Reports* **6**:25425. DOI: 10.1038/srep25425.
- 10          Molina-García L, Giraldo R. 2014. Aggregation interplay between variants of the RepA-WH1 prionoid  
11          in *Escherichia coli*. *Journal of Bacteriology* **196**:2536–2542. DOI: 10.1128/JB.01527-14.
- 12          Molina-García L, Moreno-del Álamo M, Botias P, Martín-Moldes Z, Fernández M, Sánchez-Gorostiaga  
13          A, Alonso-del Valle A, Nogales J, García-Cantalejo J, Giraldo R. 2017. Outlining core pathways of  
14          amyloid toxicity in bacteria with the RepA-WH1 prionoid. *Frontiers in Microbiology* **8**:539. DOI:  
15          10.3389/fmicb.2017.00539.
- 16          Moreno-del Álamo M, Moreno-Díaz de la Espina S, Fernández-Tresguerres ME, Giraldo R. 2015. Pre-  
17          amyloid oligomers of the proteotoxic RepA-WH1 prionoid assemble at the bacterial nucleoid.  
18          *Scientific Reports* **5**:14669. DOI: 10.1038/srep14669.
- 19          Norambuena A, Wallrabe H, Cao R, Wang DB, Silva A, Svindrych Z, Periasamy A, Hu S, Tanzi RE,  
20          Kim DY, Bloom GS. 2018. A novel lysosome-to-mitochondria signaling pathway disrupted by  
21          amyloid- $\beta$  oligomers. *EMBO Journal* **37**:e100241. DOI: 10.15252/embj.2018100241.
- 22          Olzscha H, Schermann SM, Woerner AC, Pinkert S, Hecht MH, Tartaglia GG, Vendruscolo M, Hayer-  
23          Hartl M, Hartl FU, Vabulas RM. 2011. Amyloid-like aggregates sequester numerous metastable  
24          proteins with essential cellular functions. *Cell* **144**:67–78. DOI: 10.1016/j.cell.2010.11.050.
- 25          Perov S, Lidor O, Salinas N, Golan N, Tayeb-Fligelman E, Deshmukh M, Willbold D, Landau M. 2019.  
26          Structural Insights into Curli CsgA Cross- $\beta$  Fibril Architecture Inspire Repurposing of Anti-amyloid  
27          Compounds as Anti-biofilm Agents. *PLoS Pathogens* **15**:e1007978. DOI:  
28          10.1371/journal.ppat.1007978.

- 1 Polymenidou M, Cleveland DW. 2012. Prion-like spread of protein aggregates in neurodegeneration.  
2 *Journal of Experimental Medicine* **209**:889–893. DOI: 10.1084/jem.20120741.
- 3 Prusiner SB. 1998. Prions. *Proceedings of the National Academy of Sciences of the United States of*  
4 *America* **95**:13363–13383.
- 5 Prusiner SB. 2013. Biology and genetics of prions causing neurodegeneration. *Annual Review of*  
6 *Genetics* **47**:601–623. DOI: 10.1146/annurev-genet-110711-155524.
- 7 Prusiner SB, Woerman AL, Mordes DA, Watts JC, Rampersaud R, Berry DB, Patel S, Oehler A, Lowe  
8 JK, Kravitz SN, Geschwind DH, Glidden DV, Halliday GM, Middleton LT, Gentleman SM,  
9 Grinberg LT, Giles K. 2015. Evidence for  $\alpha$ -synuclein prions causing multiple system atrophy in  
10 humans with parkinsonism. *Proceedings of the National Academy of Sciences of the United States of*  
11 *America* **112**:E5308–E5317. DOI: 10.1073/pnas.1514475112.
- 12 Qiang W, Yau WM, Lu JX, Collinge J, Tycko R. 2017. Structural variation in amyloid- $\beta$  fibrils from  
13 Alzheimer's disease clinical subtypes. *Nature* **541**:217–221. DOI: 10.1038/nature20814.
- 14 Riemschoss K, Arndt V, Bolognesi B, von Eisenhart-Rothe P, Liu S, Buravlova O, Duernberger Y,  
15 Paulsen L, Hornberger A, Hossinger A, Lorenzo-Gotor N, Hogg S, Müller SA, Tartaglia G,  
16 Lichtenthaler SF, Vorberg IM. 2019. Fibril-induced glutamine-/asparagine-rich prions recruit stress  
17 granule proteins in mammalian cells. *Life Science Alliance* **2**:e201800280. DOI:  
18 10.26508/lsa.201800280.
- 19 Seyfried NT, Dammer EB, Swarup V, Nandakumar D, Duong DM, Yin L, Deng Q, Nguyen T, Hales  
20 CM, Wingo T, Glass J, Gearing M, Thambisetty M, Troncoso JC, Geschwind DH, Lah JJ, Levey AI.  
21 2017. A Multi-network Approach Identifies Protein-Specific Co-expression in Asymptomatic and  
22 Symptomatic Alzheimer's Disease. *Cell Systems* **4**:60–72. DOI: 10.1016/j.cels.2016.11.006.
- 23 Scheckel C, Aguzzi A. 2018. Prions, prionoids and protein misfolding disorders. *Nature Reviews in*  
24 *Genetics* **19**:405–418. DOI: 10.1038/s41576-018-0011-4.
- 25 Sonati T, Reimann RR, Falsig J, Baral PK, O'Connor T, Hornemann S, Yaganoglu S, Li B, Herrmann  
26 US, Wieland B, Swayampakula M, Rahman MH, Das D, Kav N, Riek R, Liberski PP, James MN,  
27 Aguzzi A. 2013. The toxicity of antiprion antibodies is mediated by the flexible tail of the prion  
28 protein. *Nature* **501**:102–106. DOI: 10.1038/nature12402.



- 1 Soto C. 2012. Transmissible proteins: expanding the prion heresy. *Cell* **149**:968–977. DOI:  
2 10.1016/j.cell.2012.05.007.
- 3 Stöhr J, Watts JC, Mensinger ZL, Oehler A, Grillo SK, DeArmond SJ, Prusiner SB, Giles K. 2012.  
4 Purified and synthetic Alzheimer's amyloid beta (A $\beta$ ) prions. *Proceedings of the National Academy*  
5 *of Sciences of the United States of America* **109**:11025–11030. DOI: 10.1073/pnas.1206555109.
- 6 Stelzer G, Rosen R, Plaschkes I, Zimmerman S, Twik M, Fishilevich S, Iny Stein T, Nudel R, Lieder I,  
7 Mazor Y, Kaplan S, Dahary D, Warshawsky D, Guan-Golan Y, Kohn A, Rappaport N, Safran M,  
8 Lancet D. 2020. The GeneCards Suite: From Gene Data Mining to Disease Genome Sequence  
9 Analysis. *Current Protocols in Bioinformatics* **54**:1.30.1–1.30.33. DOI: 10.1002/cpbi.5.
- 10 Szklarczyk D, Gable AL, Lyon D, Junge A, Wyder S, Huerta-Cepas J, Simonovic M, Doncheva NT,  
11 Morris JH, Bork P, Jensen LJ, Mering CV. 2019. STRING v11: protein-protein association networks  
12 with increased coverage, supporting functional discovery in genome-wide experimental datasets.  
13 *Nucleic Acids Research* **47**:D607–D613. DOI: 10.1093/nar/gky1131.
- 14 Torreira E, Moreno-del Álamo M, Fuentes-Perez ME, Fernández C, Martín-Benito J, Moreno-Herrero  
15 F, Giraldo R, Llorca O. 2015. Amyloidogenesis of bacterial prionoid RepA-WH1 recapitulates dimer  
16 to monomer transitions of RepA in DNA replication initiation. *Structure* **23**:183–189. DOI:  
17 10.1016/j.str.2014.11.007.
- 18 Wang P, Deng J, Dong J, Liu J, Bigio EH, Mesulam M, Wang T, Sun L, Wang L, Lee AY, McGee WA,  
19 Chen X, Fushimi K, Zhu L, Wu JY. 2019. TDP-43 induces mitochondrial damage and activates the  
20 mitochondrial unfolded protein response. *PLoS Genetics* **15**:e1007947. DOI:  
21 10.1371/journal.pgen.1007947.
- 22 Watts JC, Condello C, Stöhr J, Oehler A, Lee J, DeArmond SJ, Lannfelt L, Ingelsson M, Giles K,  
23 Prusiner SB. 2014. Serial propagation of distinct strains of A $\beta$  prions from Alzheimer's disease  
24 patients. *Proceedings of the National Academy of Sciences of the United States of America*  
25 **111**:10323–10328. DOI: 10.1073/pnas.1408900111.
- 26 Wickner RB, Shewmaker FP, Bateman DA, Edskes HK, Gorkovskiy A, Dayani Y, Bezsonov EE. 2015.  
27 Yeast prions: structure, biology, and prion-handling systems. *Microbiology and Molecular Biology*  
28 *Reviews* **79**:1–17. DOI: 10.1128/MMBR.00041-14.

1 Woerner AC, Frottin F, Hornburg D, Feng LR, Meissner F, Patra M, Tatzelt J, Mann M, Winklhofer  
2 KF, Hartl FU, Hipp MS. 2016. Cytoplasmic protein aggregates interfere with nucleocytoplasmic  
3 transport of protein and RNA. *Science* **351**:173–176. DOI: 10.1126/science.aad2033.  
4 Yuan AH, Hochschild A. 2017. A bacterial global regulator forms a prion. *Science* **355**:198–201. DOI:  
5 10.1126/science.aai7776.

6

## 7 **Acknowledgements**

8 The authors thank their groups for much support and encouragement. We are grateful to Ana Serrano  
9 for help with plasmid construction and to the CIB-CSIC staff members Carmen Doñoro (cell culture  
10 facility) and Maite Seisedos and Gema Elvira (confocal microscopy service). The help of Pedro  
11 Lastres (CIB-CSIC) and Berta Raposo (CBM-CSIC/UAM) with flow cytometry is also acknowledged.  
12 We are indebted to Patricia Boya and her group and to Patricio Aller for helpful advice and discussions.  
13 This work has been financed with grants from the Spanish AEI (BIO2012-30852 and BIO2015-68730-  
14 R) to RG. ARG was a recipient of an AEI short-term fellowship (EEBB-I-17-12294) to work at the  
15 laboratory of IMV.

16

## 17 **Author contributions**

18 ARG carried out most experimental work and analysed data; CF prepared the fluorescence-labelled  
19 fibres and helped with their transfection and data analysis; MMdA made the plasmid constructs and  
20 earlier work with the SH-SY5Y cells; VdlR performed the proteomic analyses; IMV hosted ARG and  
21 provided expertise on the cell biology of cytoplasmic propagation of prion-like proteins; RG conceived  
22 the project, analysed data and wrote the manuscript with contributions from all the authors.

23

## 24 **Conflict of interest**

25 The authors declare that they have no conflict of interest.

26

## 27 **Figure legends**

1 **Fig. 1.** Expression of WH1(A31V)-mCherry in the cytosol of murine N2a cells.  
2 (A) Confocal maximum-intensity projection images of N2a cells expressing WH1(WT/A31V/ $\Delta$ N37)-  
3 mCherry, or mCherry as a control, 48 h after being transiently transfected (red). White arrows mark the  
4 small WH1(A31V)-mCherry fluorescent foci, whereas the large WH1( $\Delta$ N37)-mCherry inclusions are  
5 indicated with asterisks. Nuclei were stained with DAPI (blue). Yellow arrow points to an altered  
6 nucleus.  
7 (B) Quantitative analysis of condensed/fragmented nuclei in N2a transfected cells that expressed for 24,  
8 48 and 72 h either WH1(WT/A31V/ $\Delta$ N37)-mCherry or the mCherry control. The total number of cells  
9 of each type expressing the mCherry fluorescence is displayed below the X-axis.  
10 (C) N2a cell viability, quantitatively estimated from a MTT reduction assay, in response to transient  
11 expression of the RepA-WH1 variants for 24, 48 and 72 h. The inferred cytotoxicity of the proteins  
12 expressed was: WH1(A31V) >> WH1( $\Delta$ N37) > WH1(WT) > mCherry.  
13 In (B) and (C), bars correspond to the mean values from three independent transfections (n = 3). One-  
14 way ANOVA test was performed (\*, p < 0.1; \*\*, p < 0.01; \*\*\*, p < 0.001; \*\*\*\*, p < 0.0001; ns: not  
15 significant).

16  
17 **Fig. 2.** The particles assembled by WH1(A31V)-mCherry at the cytosol of murine N2a cells are  
18 amyloids.  
19 Confocal maximum-intensity projection images of N2a cells transiently expressing for 48 h  
20 WH1(WT/A31V/ $\Delta$ N37)-mCherry, or mCherry as control (red). Cells were stained with ThS (blue) for  
21 amyloid detection. Arrows mark examples of the intracellular WH1(A31V)-mCherry puncta, whereas  
22 some of the ThS-positive foci are indicated with asterisks. Just the WH1(A31V)-mCherry particles are  
23 amyloid by nature.

24  
25 **Fig. 3.** Uptake of *in vitro*-assembled, Alexa 488-labelled WH1(A31V) amyloid fibres by murine N2a  
26 cells results in the formation of foci by endogenous WH1(WT)-mCherry.  
27 (A) Experimental setup to study the induction of endogenous WH1(WT)-mCherry foci upon the uptake  
28 of exogenous WH1(A31V) fibres. N2a cells were transiently transfected with plasmids expressing

1 WH1(WT)-mCherry or the mCherry control (1) and immediately incubated with *in vitro*-assembled  
2 WH1(A31V) fibrils (2) for 24, 48 and 72 h.

3 **(B)** Confocal section images of the experiment outlined in (A) (48 h after fibre addition, unfixed cells).  
4 Exogenous WH1(A31V) fibres (green) were taken up by N2a cells expressing (red) either mCherry  
5 (top), or WH1(WT)-mCherry (bottom). The generated intracellular WH1(WT)-mCherry amyloid foci  
6 are indicated by arrows.

7 **(C)** Percentage of mCherry or WH1(WT)-mCherry expressing N2a cells bearing fluorescent foci 48 h  
8 after incubation with WH1(A31V) fibres. Bars in the graph display the means from three independent  
9 experiments (n = 3). The total number of cells of each type counted is displayed below the X-axis. For  
10 statistical analysis, Student's *t*-test was performed (\*\*\*, p < 0.001; \*\*\*\*, p < 0.0001).

11

12 **Fig. 4.** The particles induced by transfected WH1(A31V) fibres on WH1(WT)-mCherry at the cytosol of  
13 murine N2a cells are amyloidogenic.

14 Confocal maximum-intensity projections of N2a cells expressing soluble mCherry or WH1(WT)-  
15 mCherry (red), incubated for 48 h with *in vitro*-assembled, Alexa 488-labelled WH1(A31V) fibres  
16 (green). Cells were then stained with ThS (blue) for amyloid detection. Three of the fibre-nucleated  
17 WH1(WT)-mCherry puncta (arrows) that were also positive for ThS (asterisks) are highlighted.

18

19 **Fig. 5.** Uptake by human SH-SY5Y cells of WH1(A31V)-mCherry generated by murine N2a cells  
20 results in formation of foci by endogenously expressed WH1(WT)-TagGFP2.

21 **(A)** Experimental setup to study horizontal propagation of WH1(A31V) between cell lines. Twenty-four  
22 h after being transfected with plasmids, donor N2a cells transiently expressing soluble WH1(WT)-  
23 mCherry, or the amyloidogenic WH1(A31V)-mCherry, were co-cultured for up to 7 days with THN-  
24 rtTA/SH-SY5Y receptor cells stably expressing, upon Dox induction, either WH1(WT)-TagGFP2 or  
25 TagGFP2.

26 **(B) Left:** Confocal sections of cells in cultures as sketched in (A) in which the receptor cells (R) were  
27 expressing the TagGFP2 control, while the donor cells (D) were either WH1(WT)-mCherry or  
28 WH1(A31V)-mCherry. No large fluorescent puncta were observed after 5 days. DAPI staining of

1 nuclear DNA was carried out. *Right*: Percentage of THN-rtTA/SH-SY5Y/TagGFP2 receptor cells (R)  
2 bearing intracellular foci after 5 days of co-culture with transiently transfected WH1(WT)-mCherry or  
3 WH1(A31V)-mCherry N2a donors (D).  
4 (C) *Left*: Confocal sections of cells in cultures as those in (B), but in which the receptors (R) were  
5 expressing WH1(WT)-TagGFP2 instead of just TagGFP2. Bright green spots (arrows) were  
6 differentially promoted by the cells donating WH1(A31V)-mCherry, but not by those expressing  
7 WH1(WT)-mCherry. *Right*: Quantitative analysis of intercellular propagation of RepA-WH1.  
8 Percentage of THN-rtTA/SH-SY5Y/WH1(WT)-TagGFP2 receptor cells (R) bearing intracellular foci  
9 after 5 days of co-culture with transiently transfected WH1(WT)-mCherry or WH1(A31V)-mCherry  
10 N2a donors (D).  
11 Bars displayed in both histograms are the mean of three independent experiments (n = 3). The total  
12 number of cells of each type counted is displayed below the X-axes. For statistical analysis, Student's *t*-  
13 test was performed (\*\*\*, p < 0.001; ns, not statistically significant).

14  
15 **Fig. 6.** Proteome-wide responses of mammalian cells expressing WH1(WT) to either *in vitro* assembled  
16 WH1(A31V) fibres or WH1(A31V)-mCherry released from co-cultured cells.

17 The cartoon displays, overlaid to the sketch of a mammalian cell, the names of the proteins  
18 differentially and uniquely found in cells expressing WH1(WT)-mCherry, and on which amyloids were  
19 templated by either fibre-to-cell or cell-to-cell transmission. Proteins are grouped in boxes according to  
20 their subcellular location, with numbers representing the fraction of the proteome dataset allocated to  
21 each compartment. Colour coding refers to the main function reported in the literature for these proteins  
22 (see the legend below, including the fraction of the proteins placed in each functional group).

## 23 24 **Supplementary Files**

25 **Fig. S1.** Transient expression in mammalian cell lines of distinct variants of the bacterial prion-like  
26 protein RepA-WH1 fused to the red fluorescent protein mCherry.

27 (A) Schematic linear representation of the pcDNA3.1 plasmid constructs used to transiently express  
28 either the distinct WH1-mCherry fusions or the mCherry control in mammalian cell lines.

1 (B) Assessing the expression of the WH1-mCherry derived constructions (WT/A31V/ $\Delta$ N37;  $\approx$ 55 kDa),  
2 or the mCherry control (35 kDa), in (A) by Western-blotting of soluble lysates 48 h after transient  
3 transfection of N2a, SH-SY5Y and HeLa cell lines. Protein constructions were detected using an anti-  
4 mCherry antibody. Actin (42 kDa) as a loading control was visualized with an anti-actin antibody. The  
5 insoluble fraction (pellet) of cells expressing WH1( $\Delta$ N37) in the N2a cells is also shown, compatible  
6 with its tendency to form large foci in bacteria (Gasset-Rosa et al., 2014; Molina-García et al., 2014).

7  
8 **Fig. S2.** *In vitro*-assembled and Alexa 488-labelled WH1(A31V) fibres used for co-cultivation with the  
9 murine N2a cells.

10 (A) Negative staining TEM micrographs of the fibres before (*left*) and after (*right*) being disrupted by  
11 means of sonication, previously to their addition to the transfected N2a cells.

12 (B) Confocal section of the fibre samples. Green fluorescence from the tracer Alexa 488-labelled  
13 WH1(A31V) molecules incorporated into the fibres is evident.

14  
15 **Fig. S3.** Experimental setting used for the stable expression of proteins in the human neuroblastoma cell  
16 line SH-SY5Y.

17 (A) Tet-ON, doxycycline (Dox)-dependent expression cascade from the integrated pCMV-Tet3G  
18 transactivator (rtTA; *left*) and the pTRE3G response plasmids (*right*).

19 (B) Western-blot of protein extracts from THN-rtTA/SH-SY5Y cells expressing WH1(WT)-TagGFP2  
20 or TagGFP2 upon induction for 48 h with 0.5  $\mu$ g/ml Dox. Protein fusions were probed with an anti-GFP  
21 antibody, whereas detection of vinculin ( $\approx$ 123 kDa) was used as a loading control.

22 (C) Flow cytometry histograms (FL1 channel) highlighting the population of live THN-rtTA/SH-SY5Y  
23 cells expressing (green) or not (grey) the engineered fluorescent proteins after 48 h of culture in the  
24 presence of Dox (see B). Mean fluorescence intensity (MFI) TagGFP2: 3.44; MFI WH1(WT)-  
25 TagGFP2: 1.61.

26 (D) Confocal maximum-intensity projections images of THN-rtTA/SH-SY5Y clones stably expressing  
27 the rtTA transactivator and TagGFP2, or WH1(WT)-TagGFP2 (green), 48 h after Dox addition. Nuclei

1 were visualized using DAPI (blue). Both proteins are expressed soluble (diffuse fluorescence) in the  
2 cytoplasm.

3  
4 **Fig. S4.** Systems analysis of the response of murine N2a (A) and human THN-rtTA/SH-SY5Y (B) cells,  
5 expressing soluble WH1(WT) or its fluorescent tags, to co-cultivation with the *in vitro*-assembled and  
6 the cell-released WH1(A31V) amyloids, respectively. Venn diagrams (*top*) indicate the number of  
7 proteins exclusively identified in the WH1(WT)-mCherry/TagGFP2 or in the control  
8 mCherry/TagGFP2 cells (Figure 6), as well as in both of them, over those found in the naïve N2a or  
9 THN-rtTA/SH-SY5Y backgrounds when challenged with the same fibres or donor cells, which were  
10 subtracted. STRING v.11 (Szkarczyk et al., 2019) functional clustering analysis (*bottom*; inset:  
11 program settings) was performed, using all available prediction sources, for the proteins identified as  
12 differentially expressed under both experimental settings. After removing the unconnected nodes, the  
13 remaining clusters, similar under both amyloid transmission scenarios, point to contributions of the  
14 mitochondrial membrane respiratory complexes, protein quality control and signalling/trafficking to the  
15 RepA-WH1 ‘generic’ model of amyloidosis in mammalian cells.

16  
17 **Supplemental Dataset S1.** ESI-MS/MS analysis of the proteome response of mouse N2a cells to  
18 WH1(A31V) fibril uptake-promoted amyloidogenesis.

19  
20 **Supplemental Dataset S2.** ESI-MS/MS analysis of the proteome response of human THN-rtTA/SH-  
21 SY5Y cells on transmission of WH1(A31V)-mCherry from murine N2a cells.

22  
23 **Table S1.** Subset of proteins in Datasets S1 and S2 matching proteins/genes differentially located in  
24 published system analyses of aggregation-triggered neurodegeneration.

25



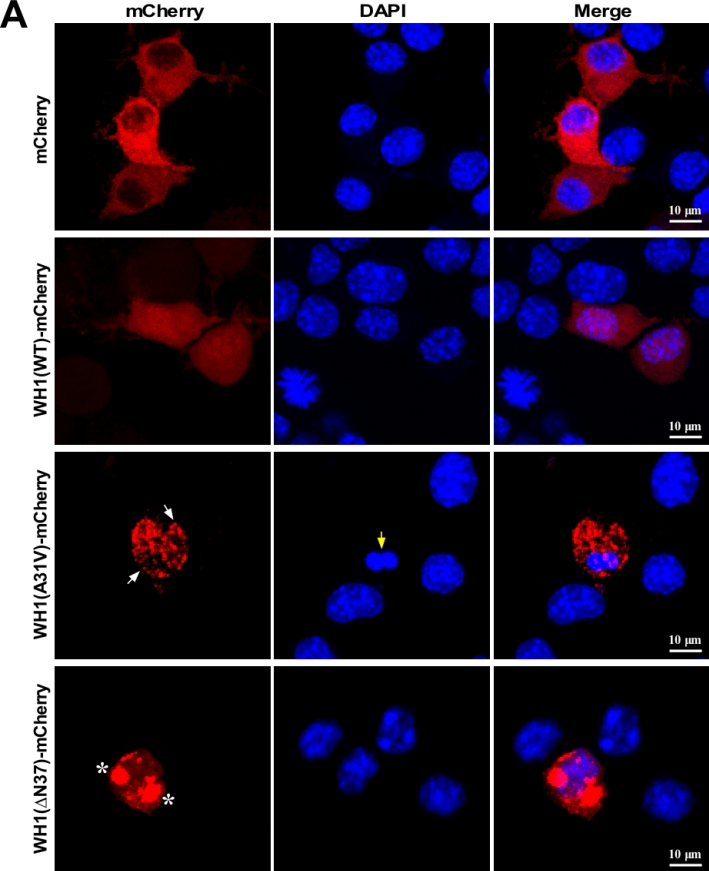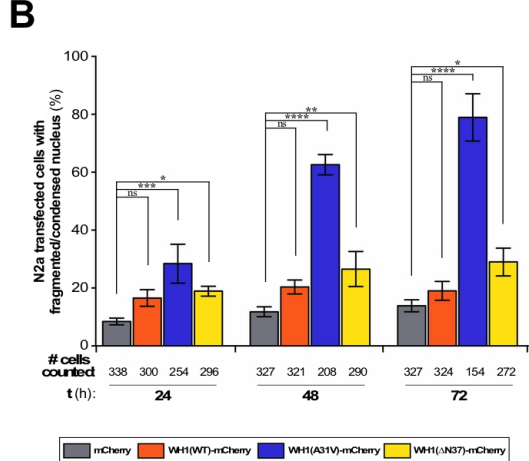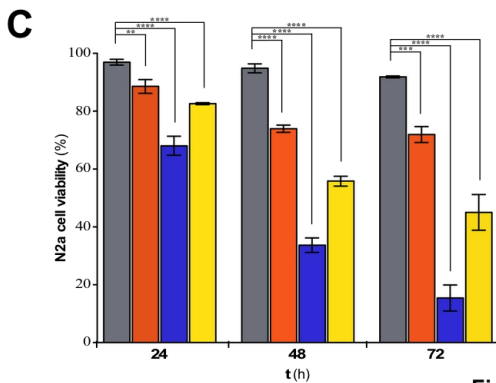

Fig. 1

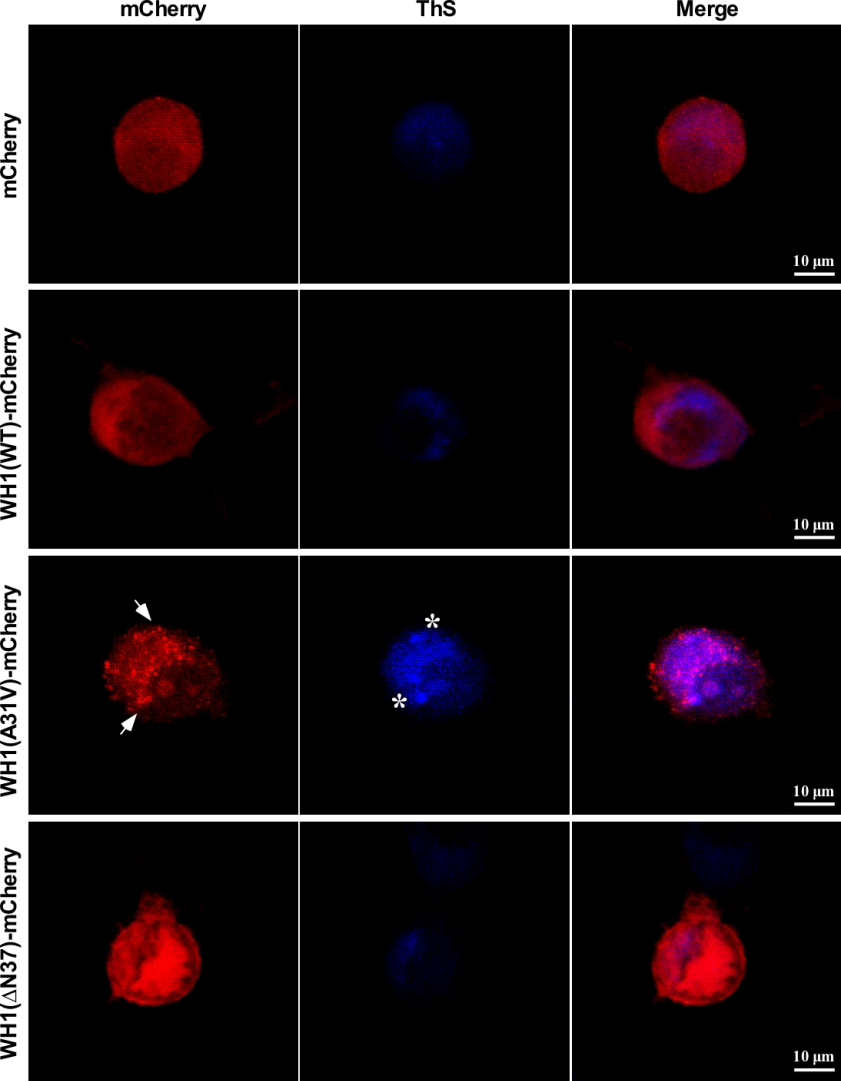

Fig. 2

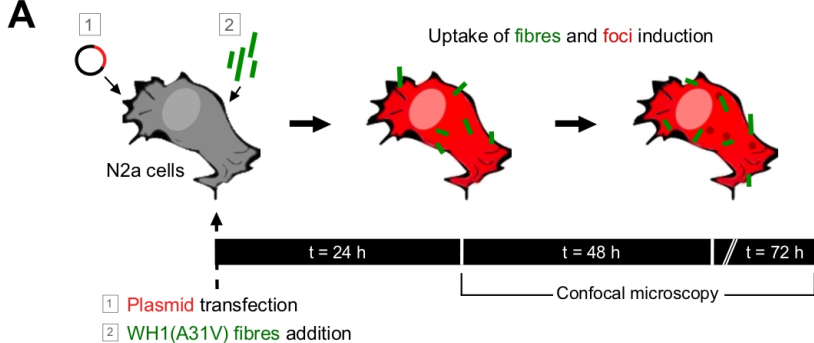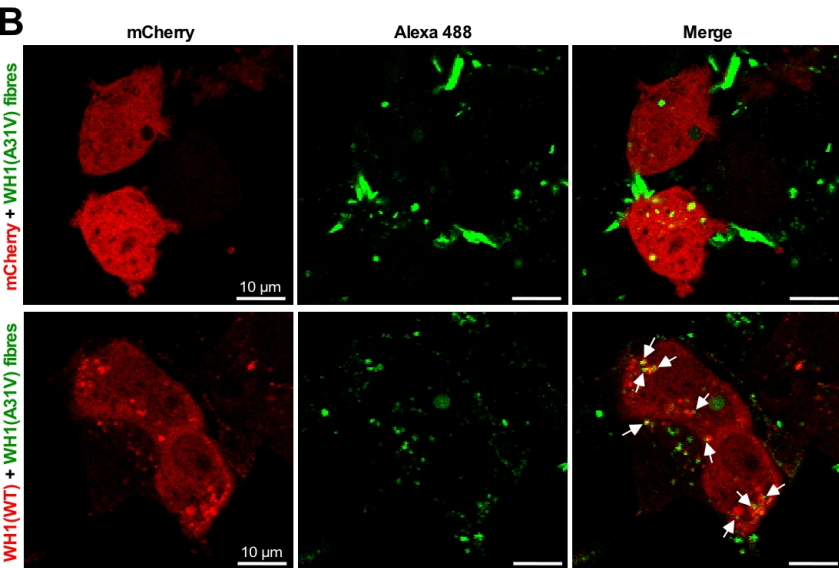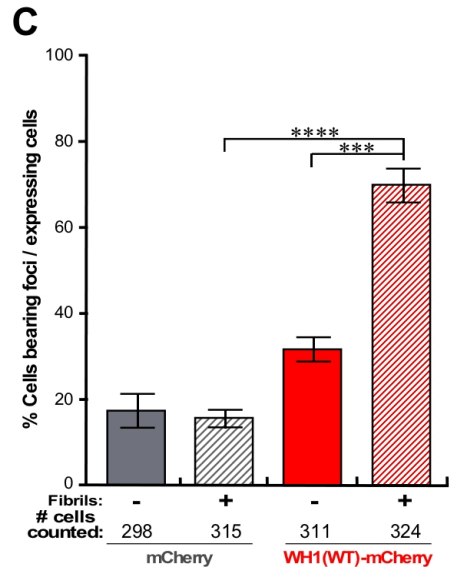

Fig. 3

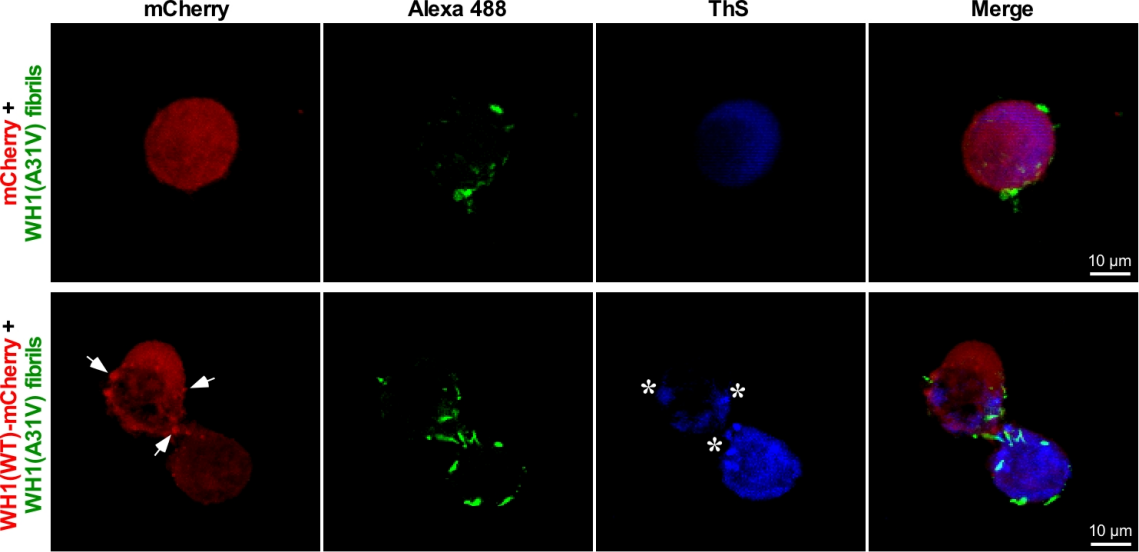

Fig. 4

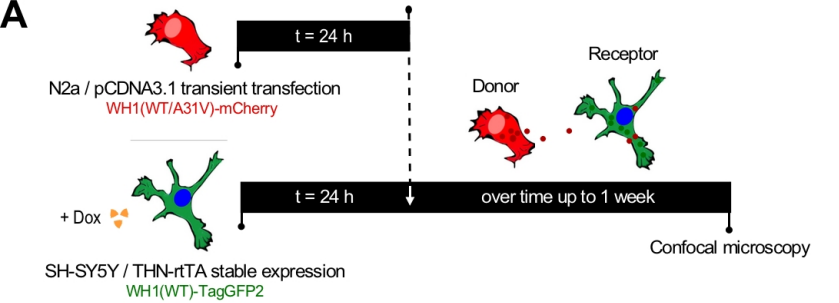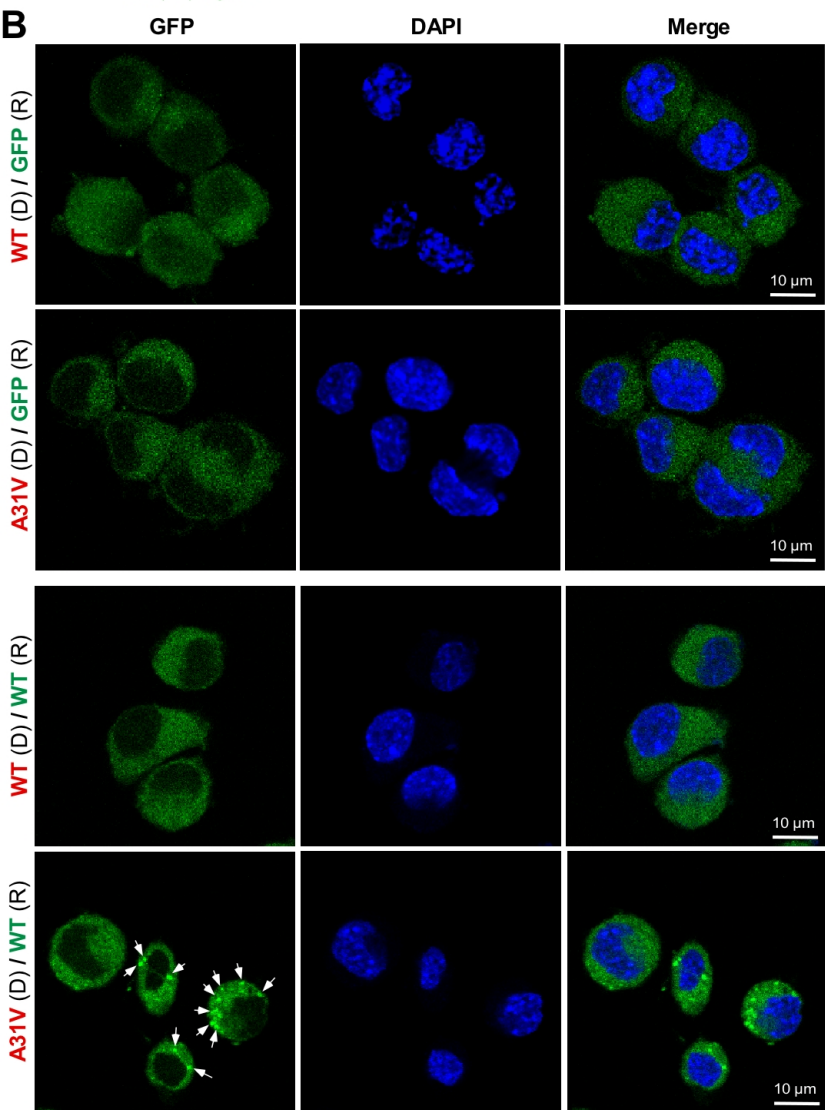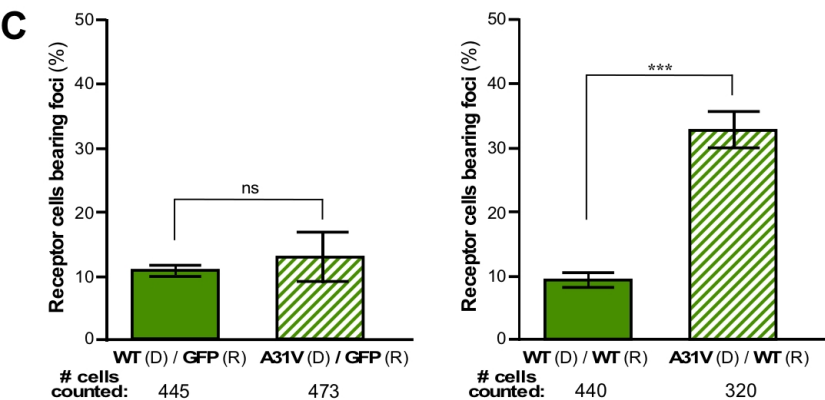

Fig. 5

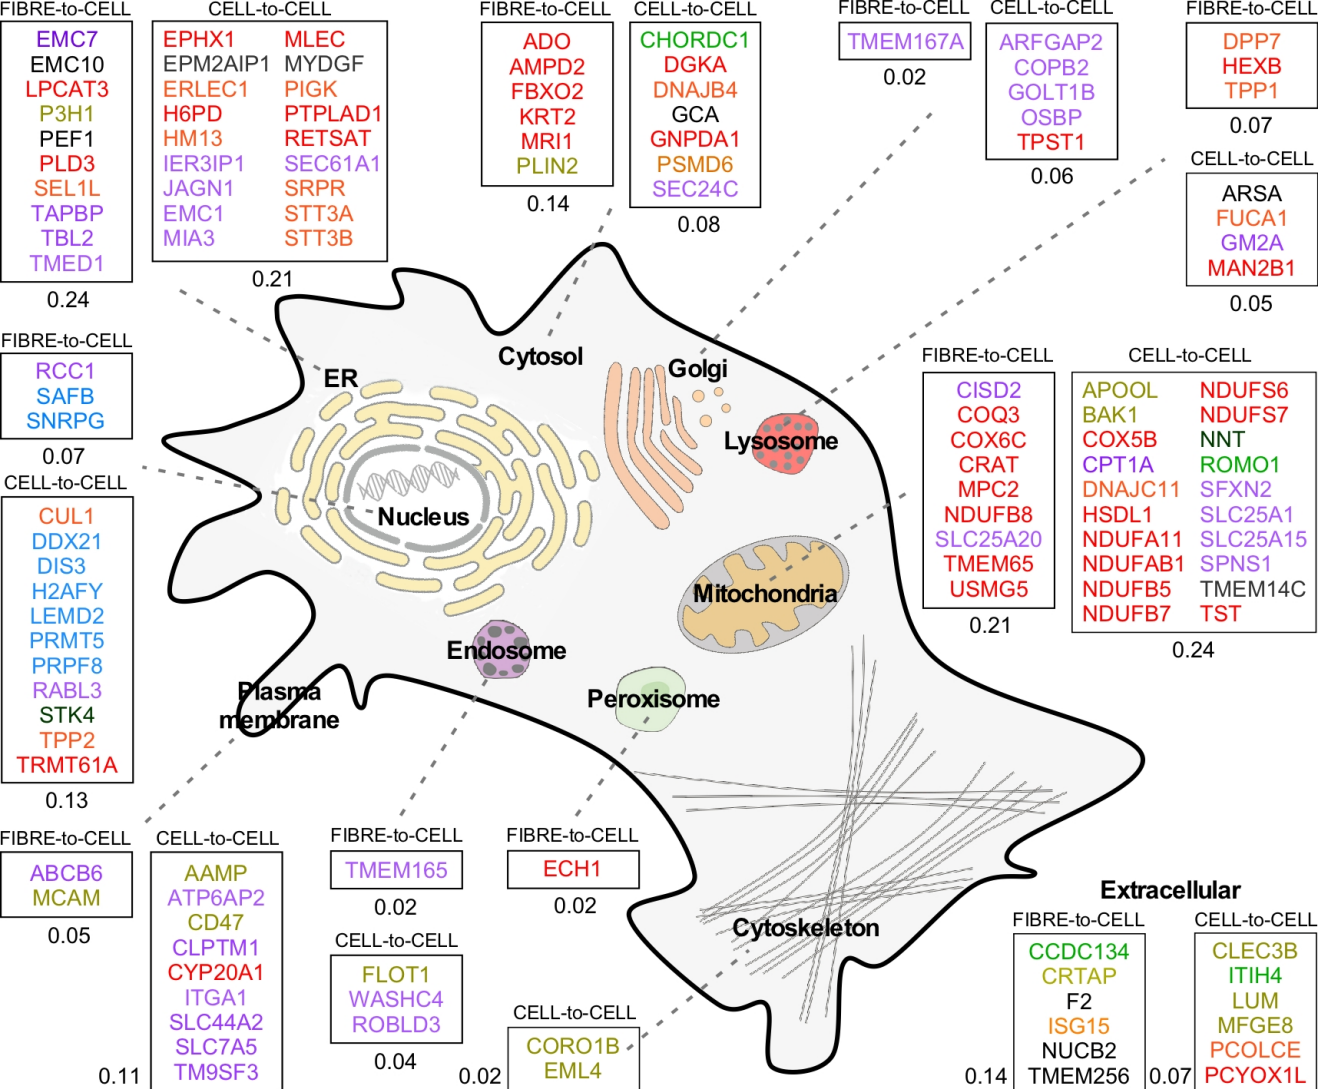

| Function Category                                                                                                     | FIBRE-to-CELL | CELL-to-CELL |
|-----------------------------------------------------------------------------------------------------------------------|---------------|--------------|
| <b>Cellular structure:</b> cytoskeleton and cellular adhesion                                                         | 0.09          | 0.12         |
| <b>Gene expression and genome maintenance:</b> transcription, replication, translation, repair, splicing, chromosomes | 0.05          | 0.07         |
| <b>Metabolism</b>                                                                                                     | 0.38          | 0.25         |
| <b>Protein quality control:</b> chaperones, proteases, post-translational mod.                                        | 0.10          | 0.15         |
| <b>Signalling or transport:</b> ER → Golgi → membrane                                                                 | 0.24          | 0.29         |
| <b>Stress or response to infection:</b> autophagy, apoptosis                                                          | 0.02          | 0.03         |
| <b>Others / Unknown function</b>                                                                                      | 0.12          | 0.08         |

Fig. 6

**A**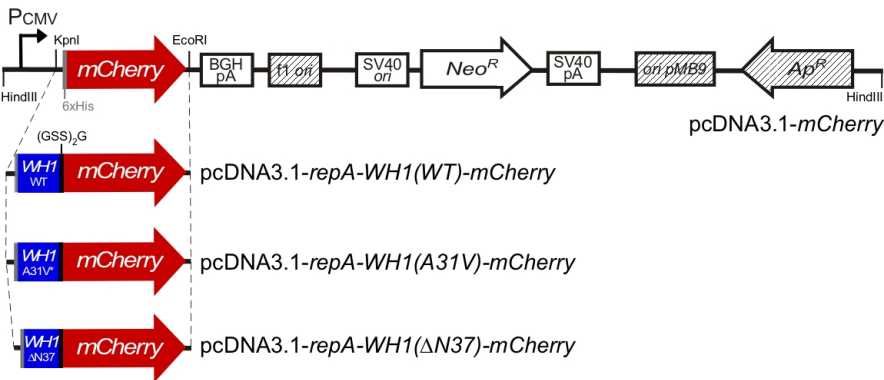**B**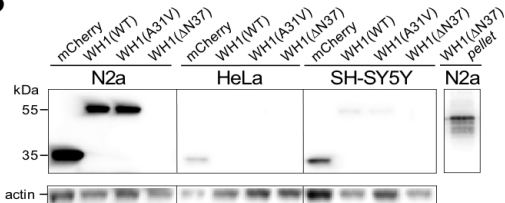**Fig. S1**



**A**

## Electron microscopy

Unfragmented WH1(A31V) fibres

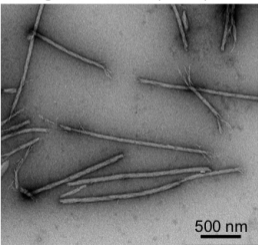

Fragmented WH1(A31V) fibres

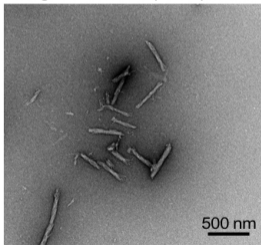**B**

## Confocal microscopy

Fragmented WH1(A31V) fibres

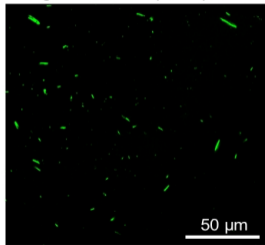**Fig. S2**

**A** pCMV-Tet3G regulatory plasmid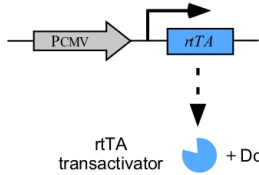**pTRE3G-WH1( $\Delta$ WT/A31V)-TagGFP2 response plasmids**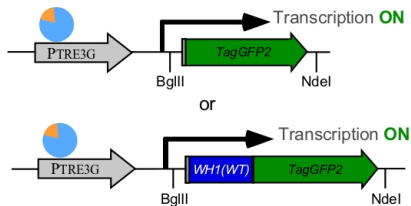**B**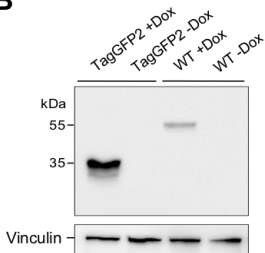**C**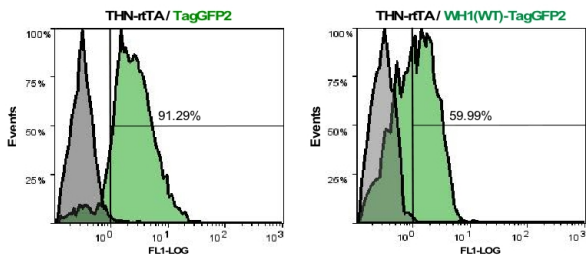**D**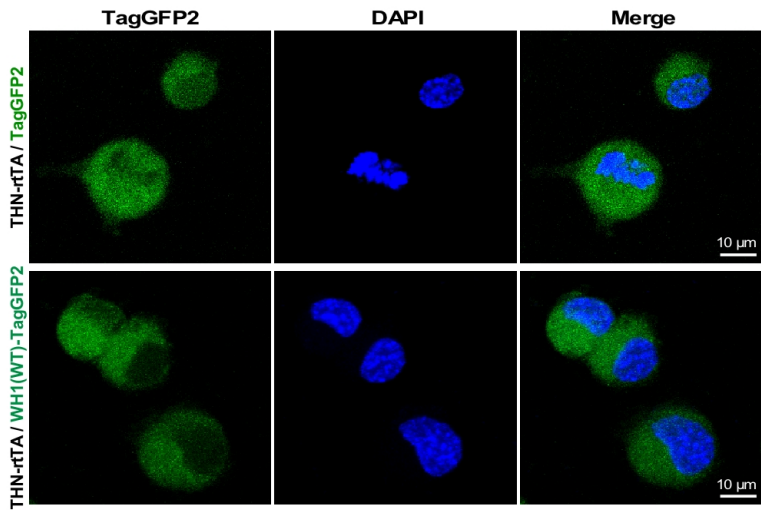

Fig. S3
